# Supplementary material for: Wnt/β-catenin/HNF4α feedback loop facilitates colorectal tumorigenesis and malignancy
Source: Research Square preprint supplement (doi:10.21203/rs.3.rs-6208041/v1), 2025-05-06
Supplement: Supplementary file 1 [file a255b42e222c2f8488a02880.pdf]

Experimental raw data of Western blot

Fig 1B

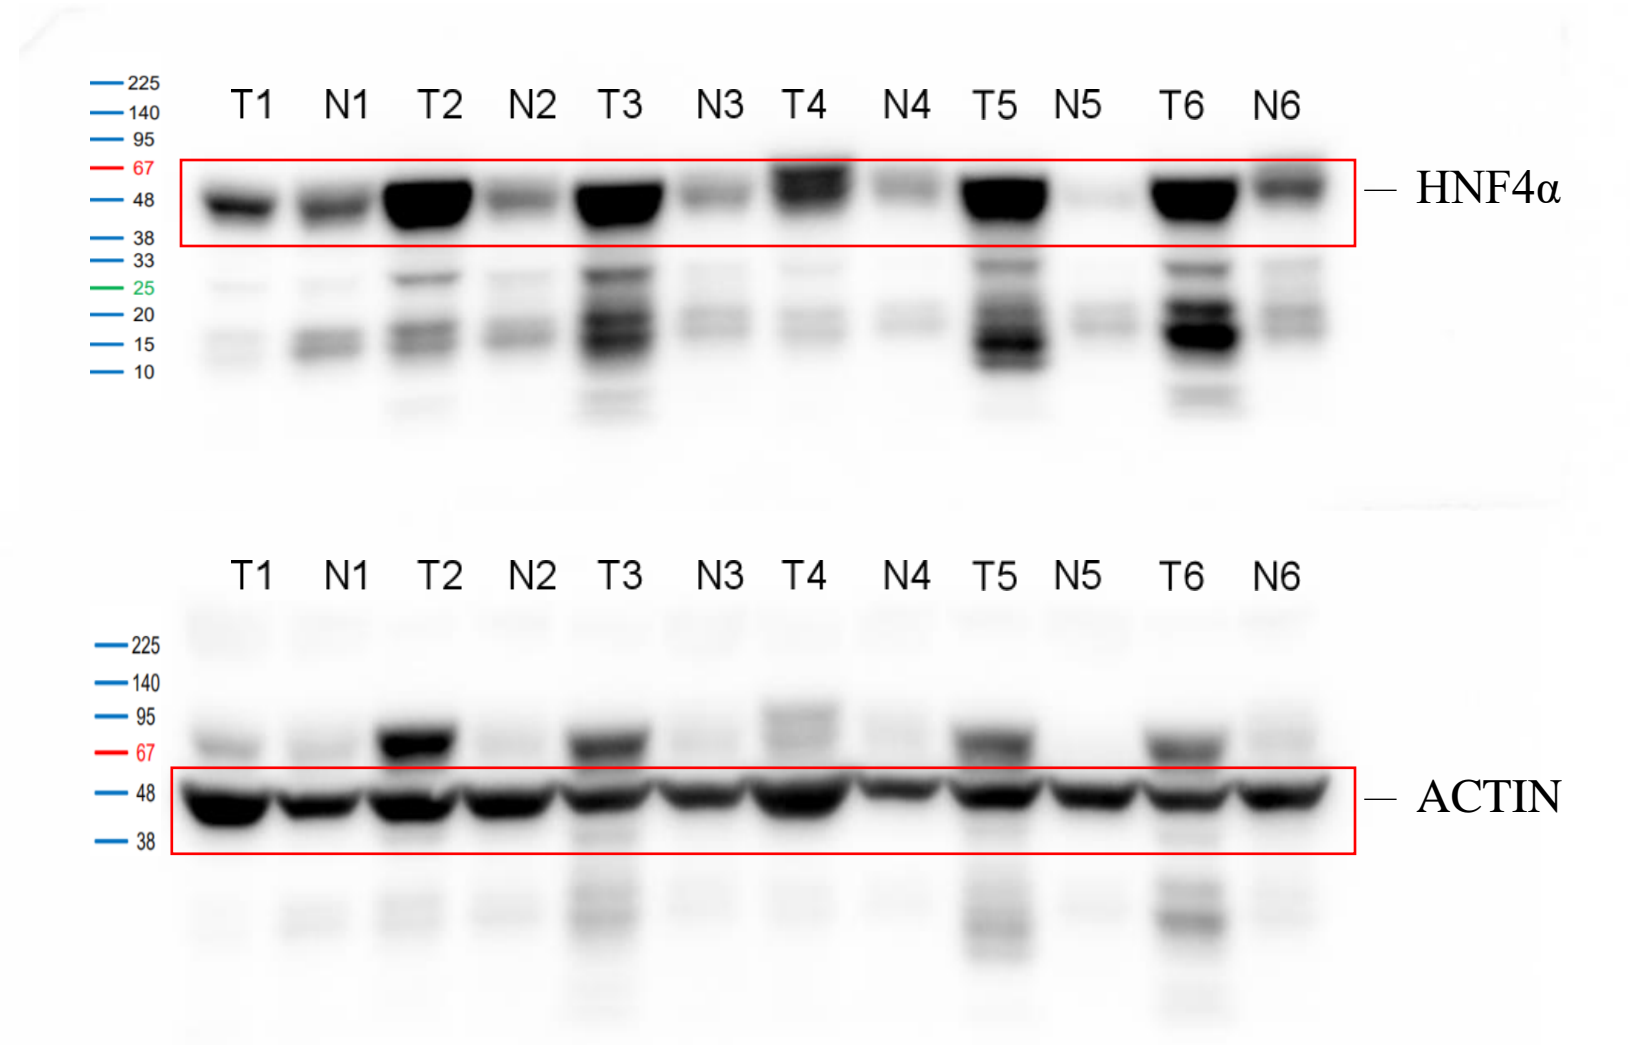

10% SDS polyacrylamide gel was used for protein separation.

Fig 1B

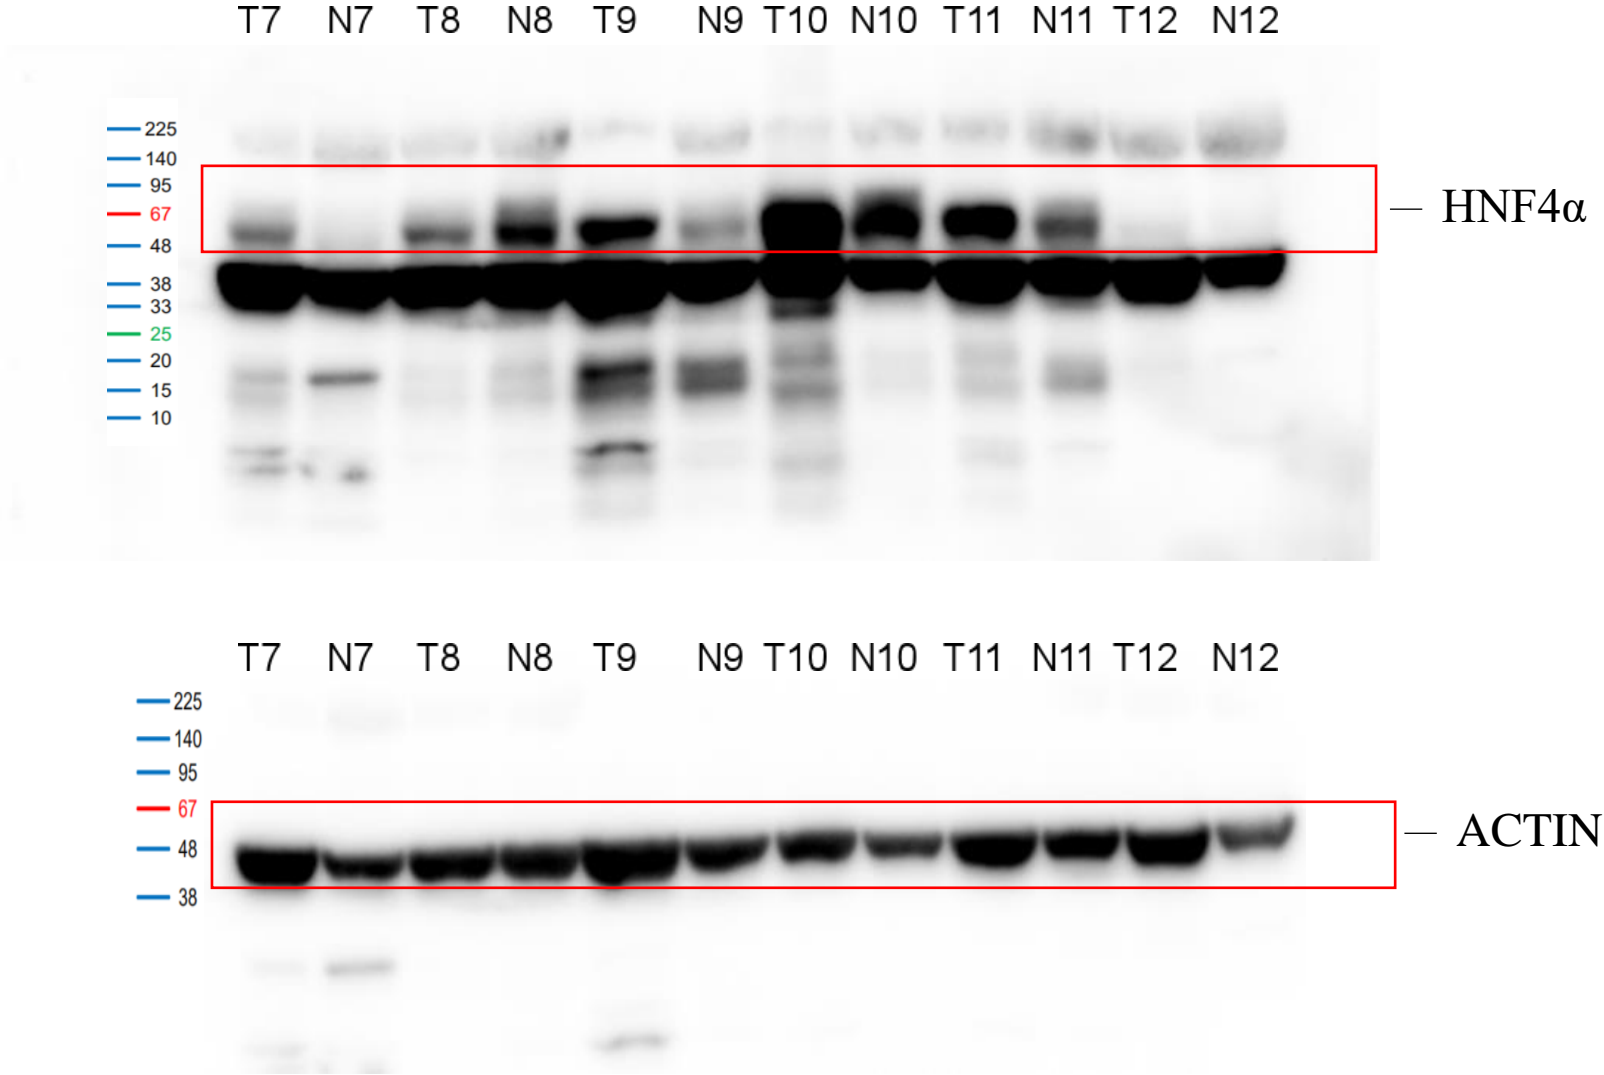

10% SDS polyacrylamide gel was used for protein separation.

Fig 1B

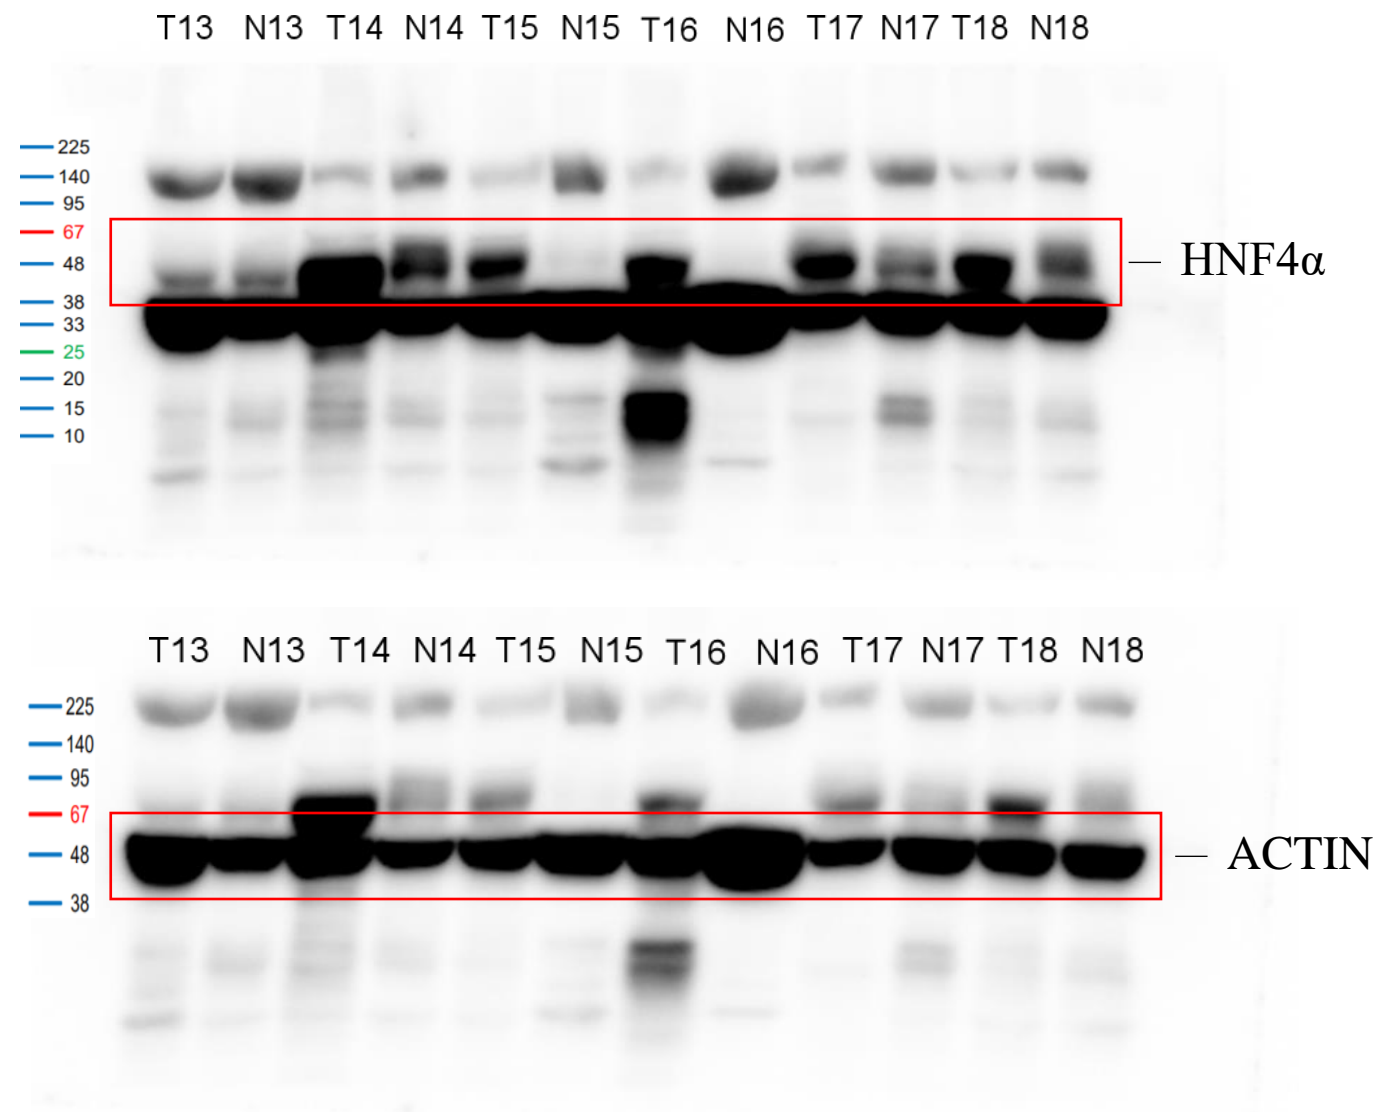

10% SDS polyacrylamide gel was used for protein separation.

Fig 2C left

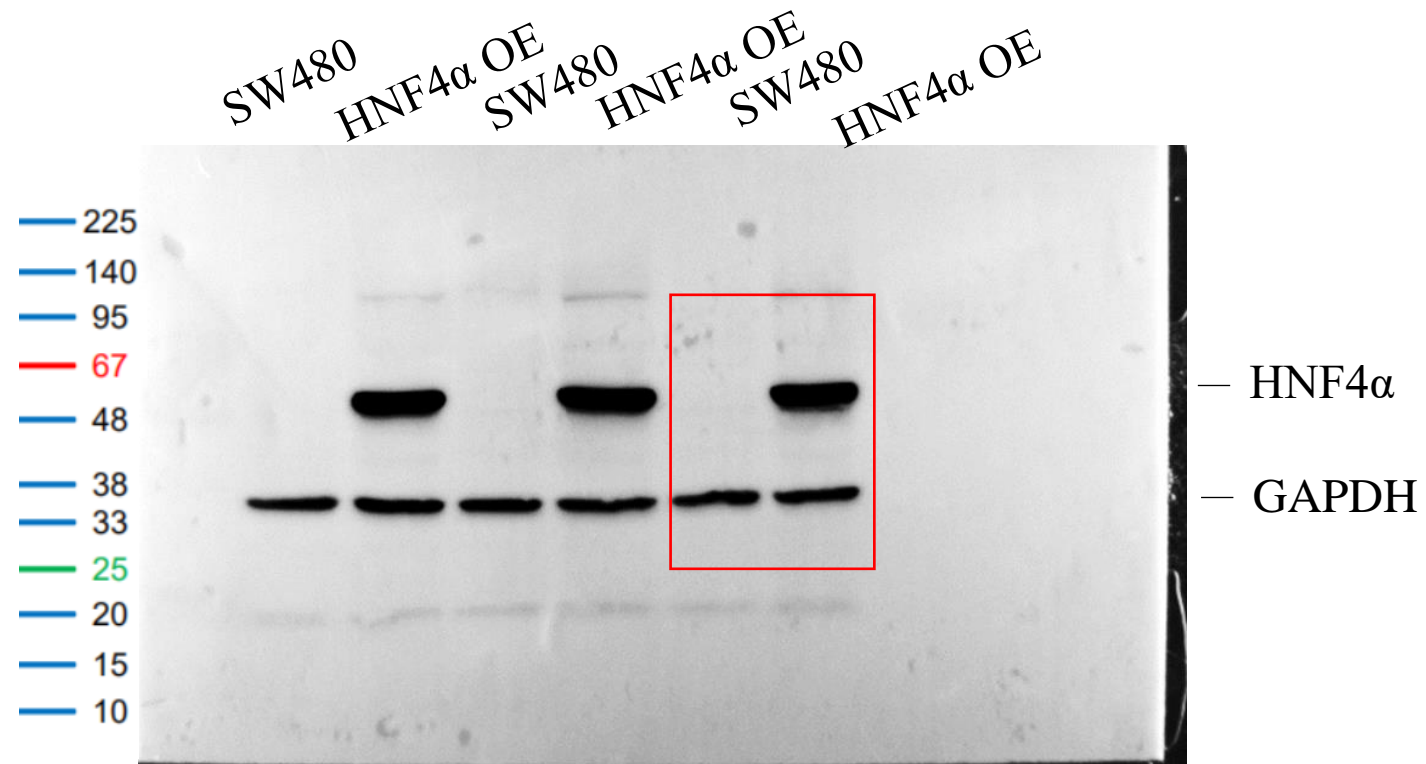

10% SDS polyacrylamide gel was used for protein separation.

Fig 2C right

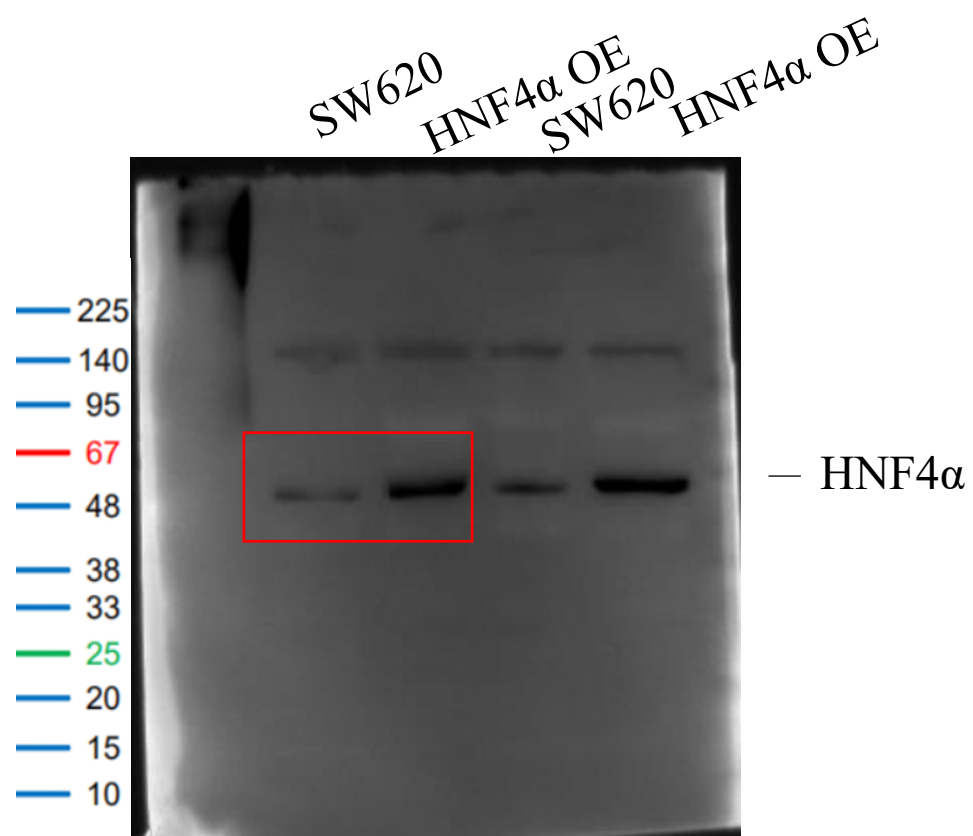

Fig 2C right

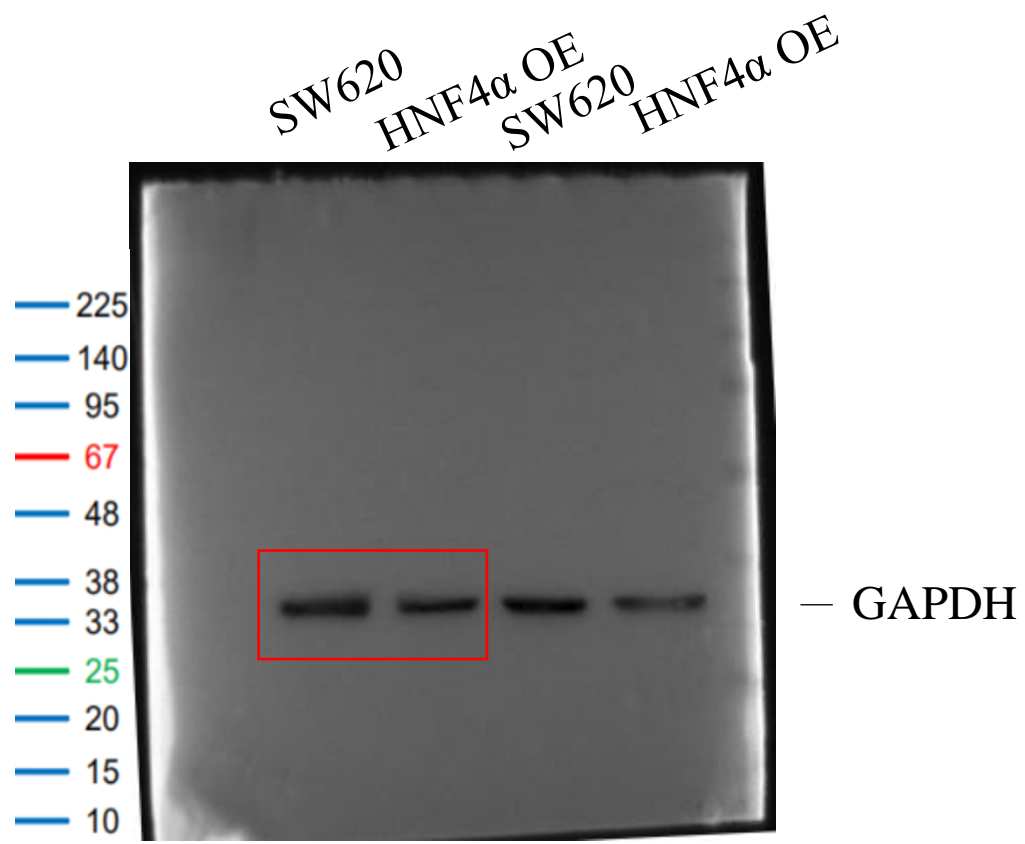

Protein separation was performed using duplicate 10% SDS-polyacrylamide gels to resolve bands with closely spaced molecular weights.

Fig 2G

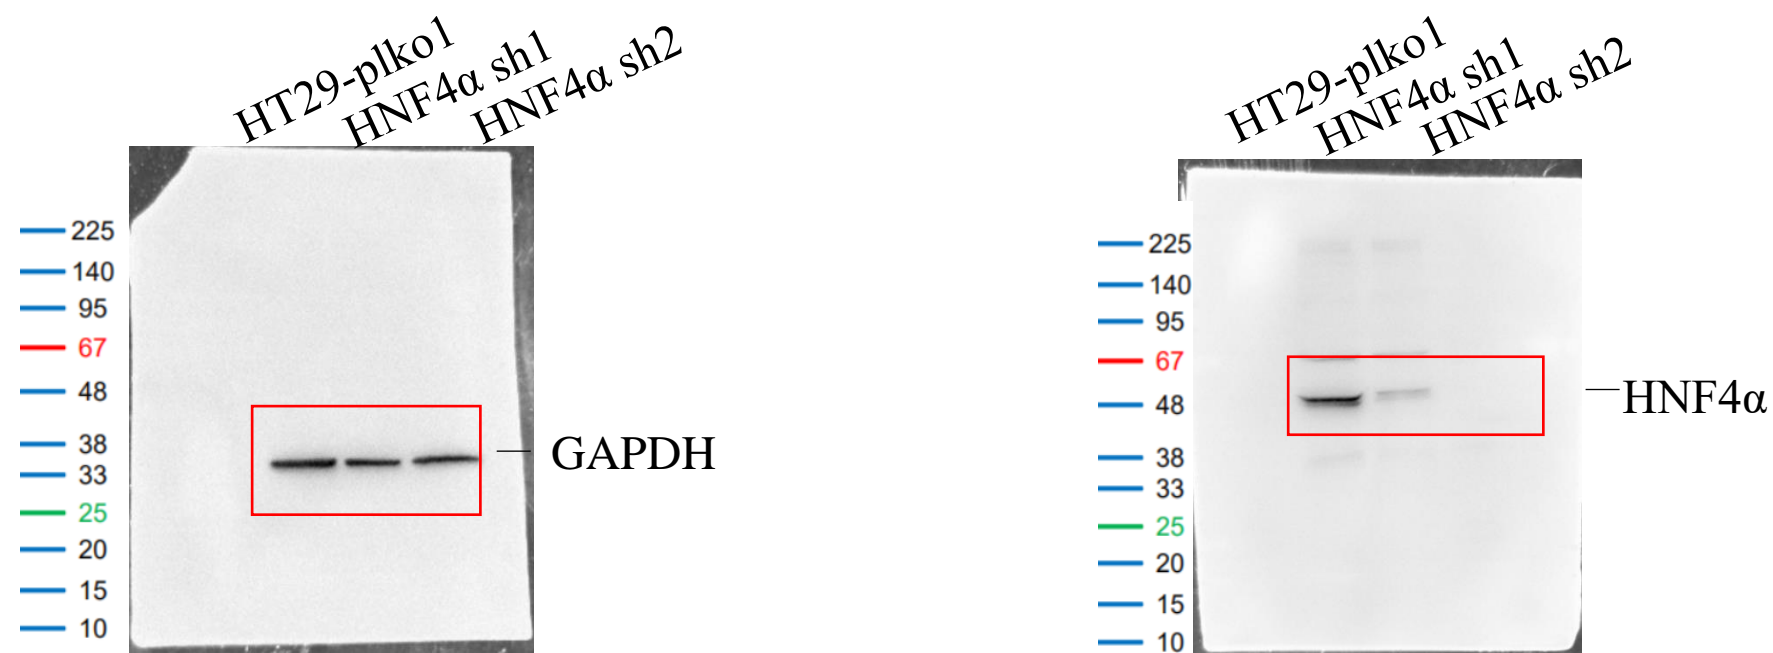

Fig 3D

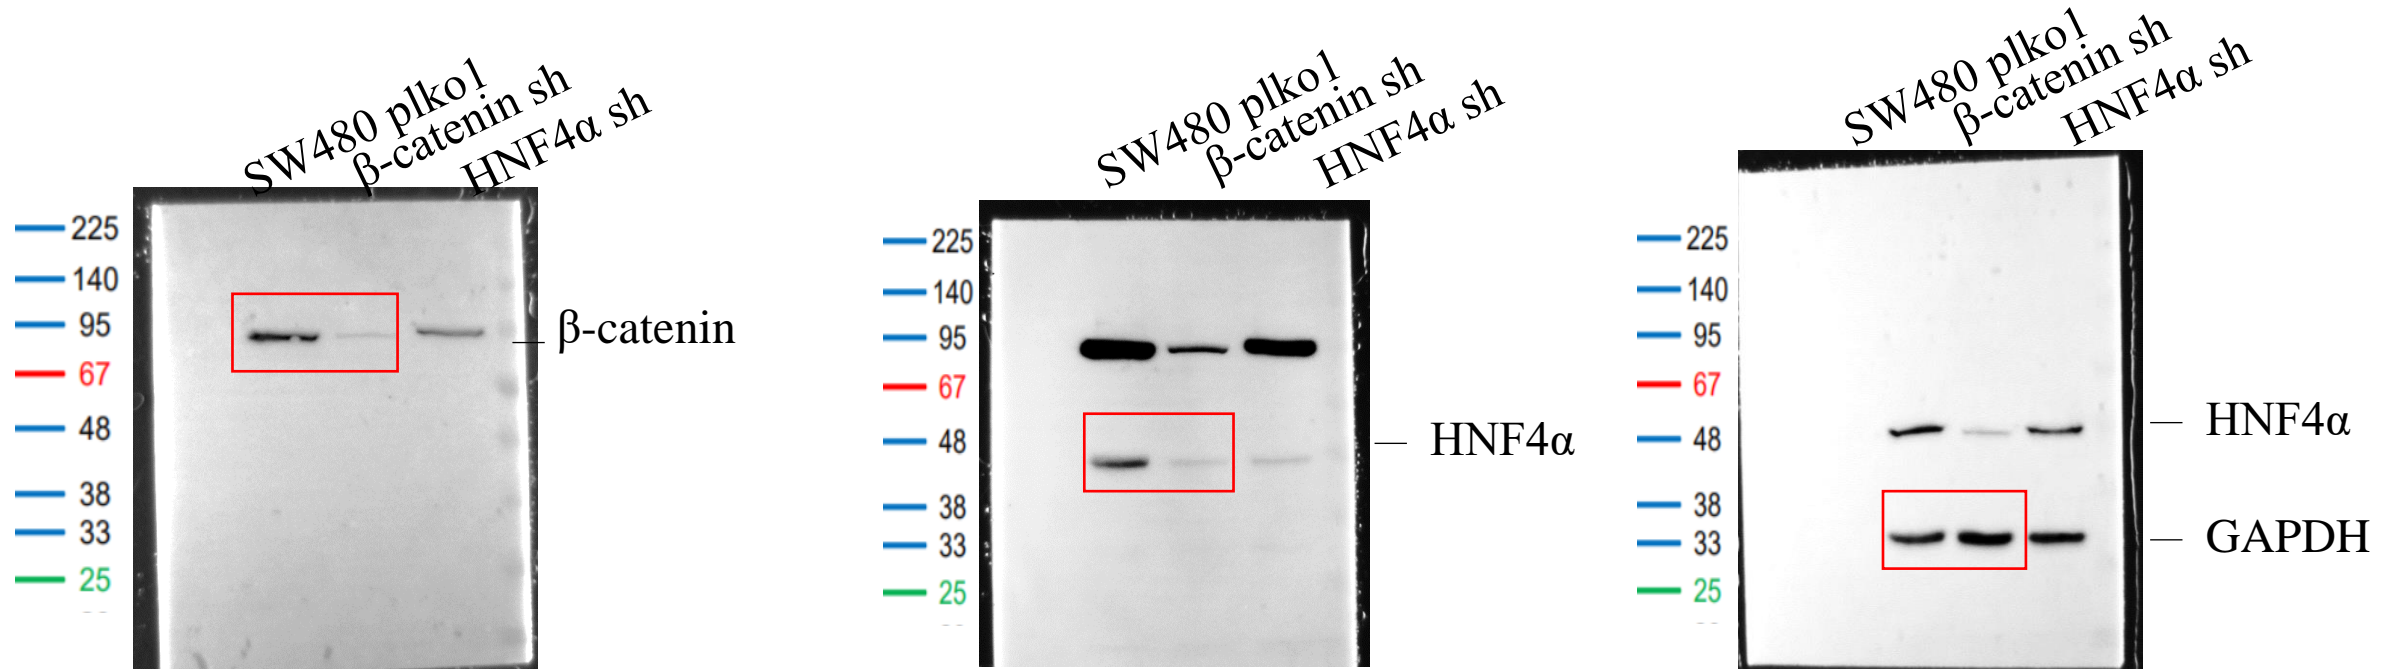

10% SDS polyacrylamide gel was used for protein separation.



Fig 3D

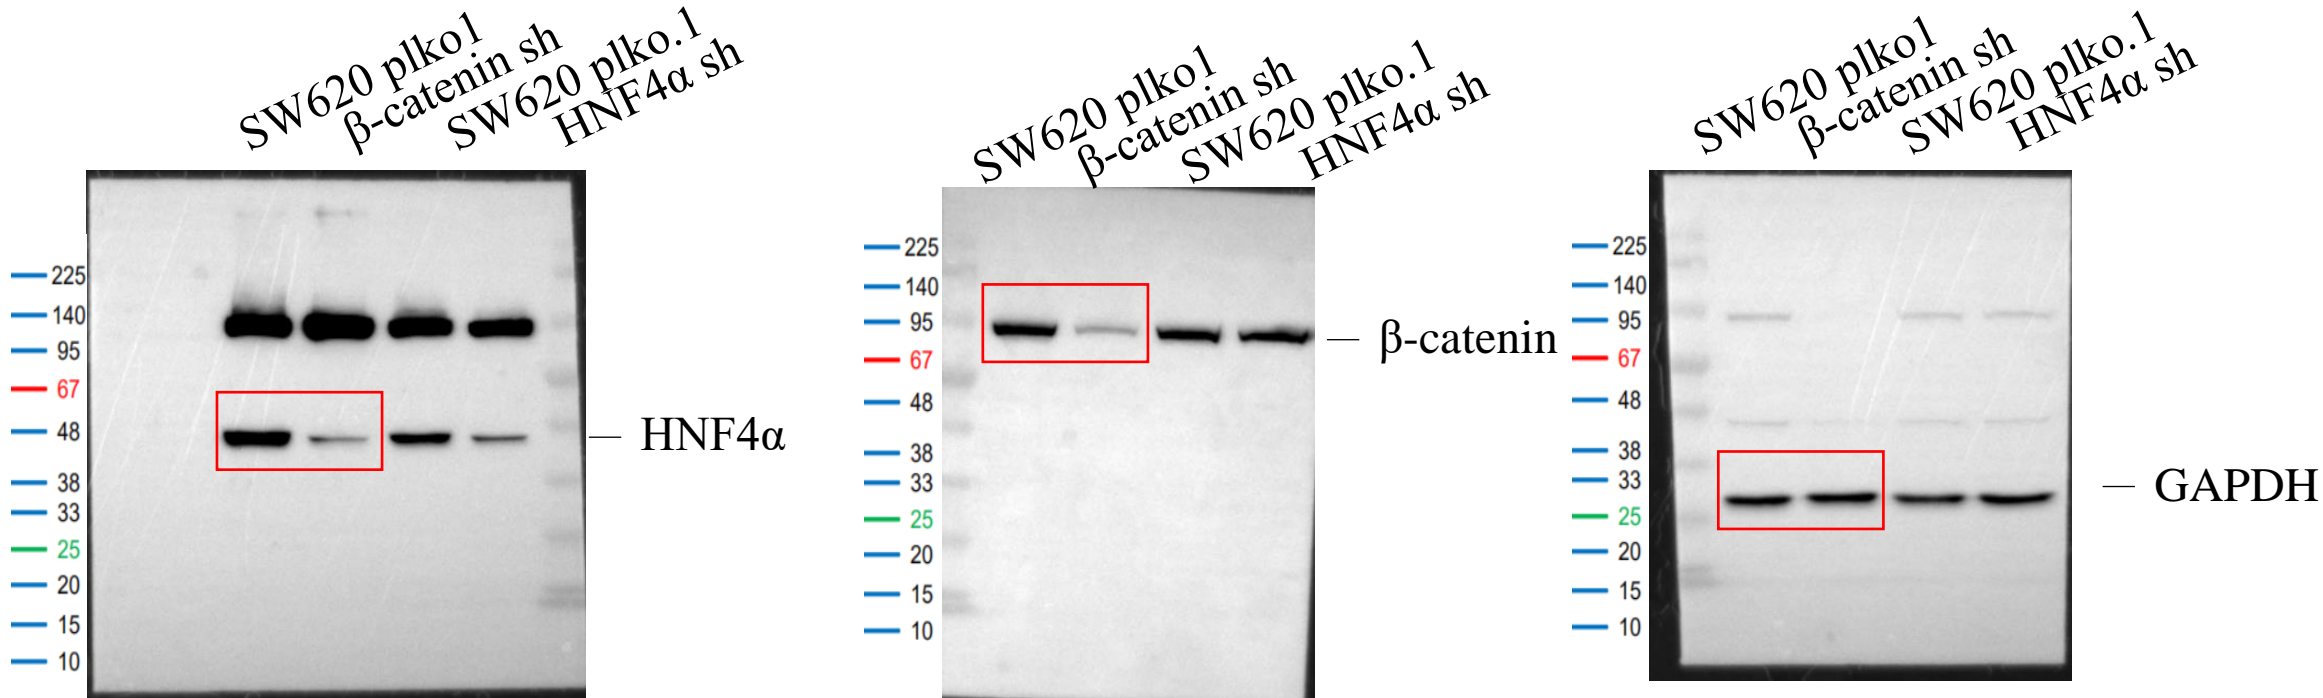

Protein separation was performed using duplicate 10% SDS-polyacrylamide gels to resolve bands with closely spaced molecular weights.

Fig 3D

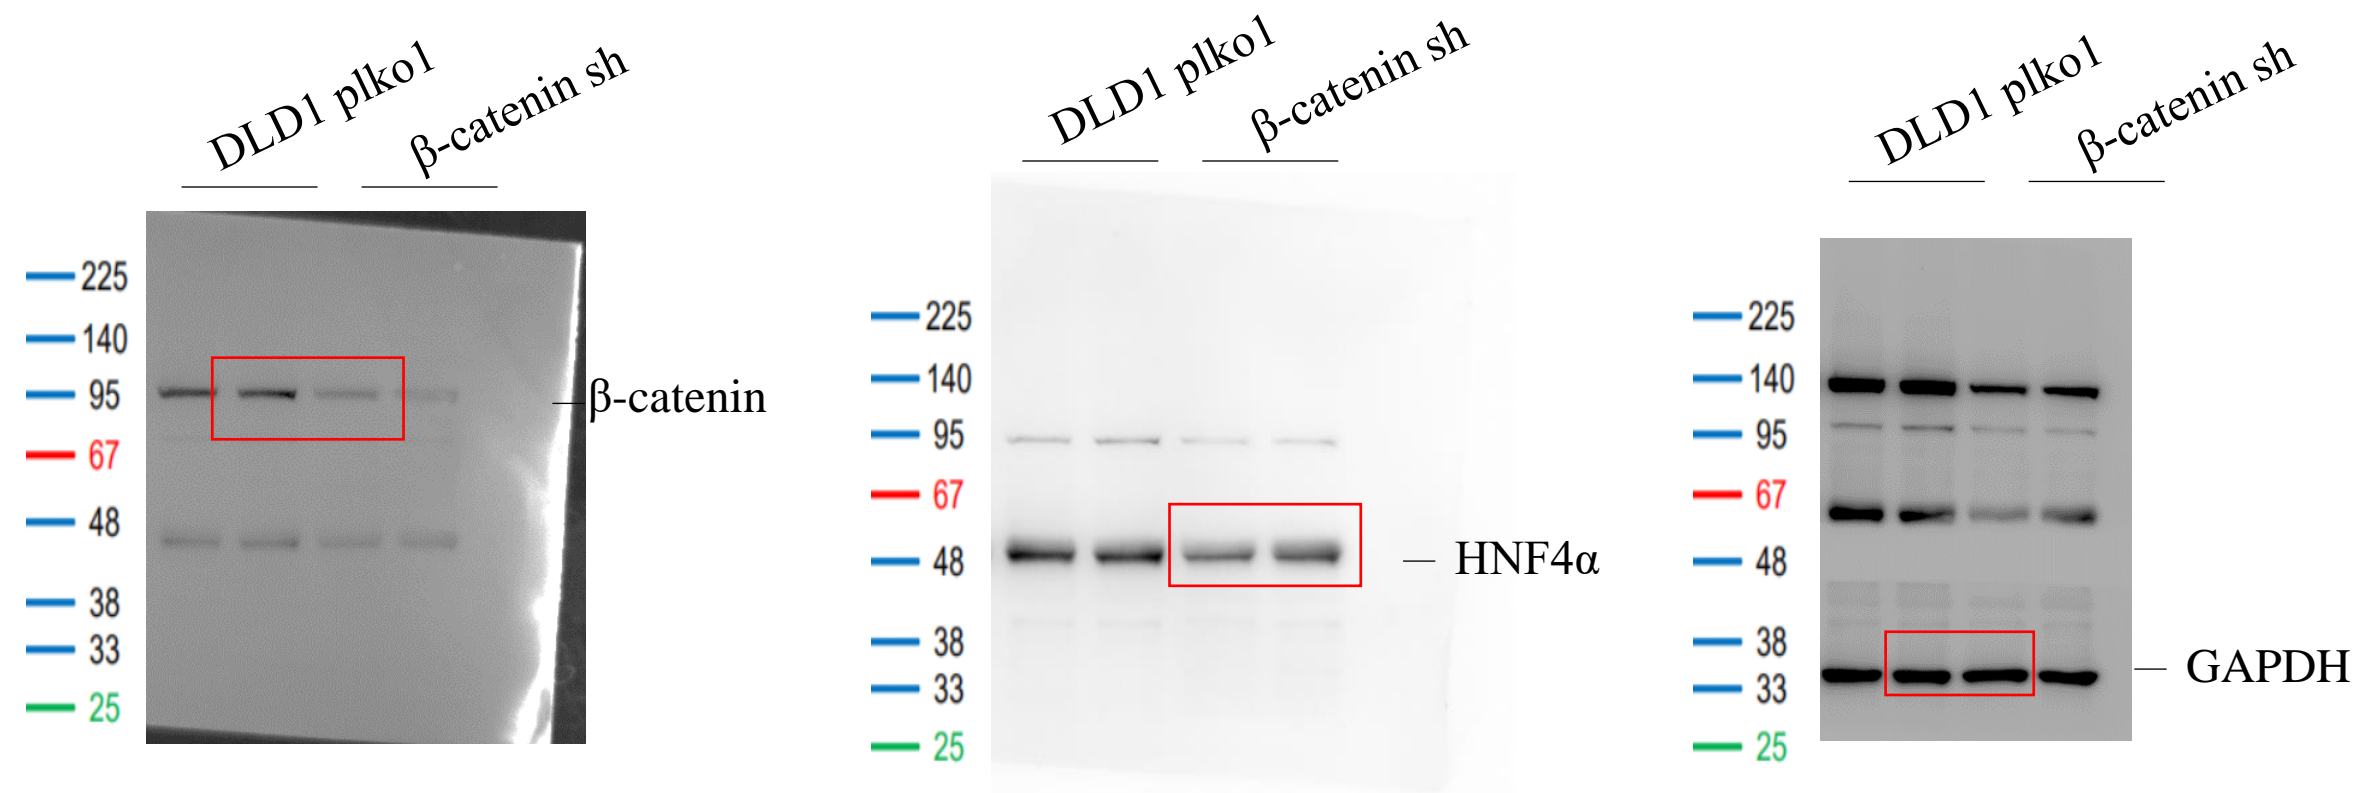

10% SDS polyacrylamide gel was used for protein separation.

Fig 3G

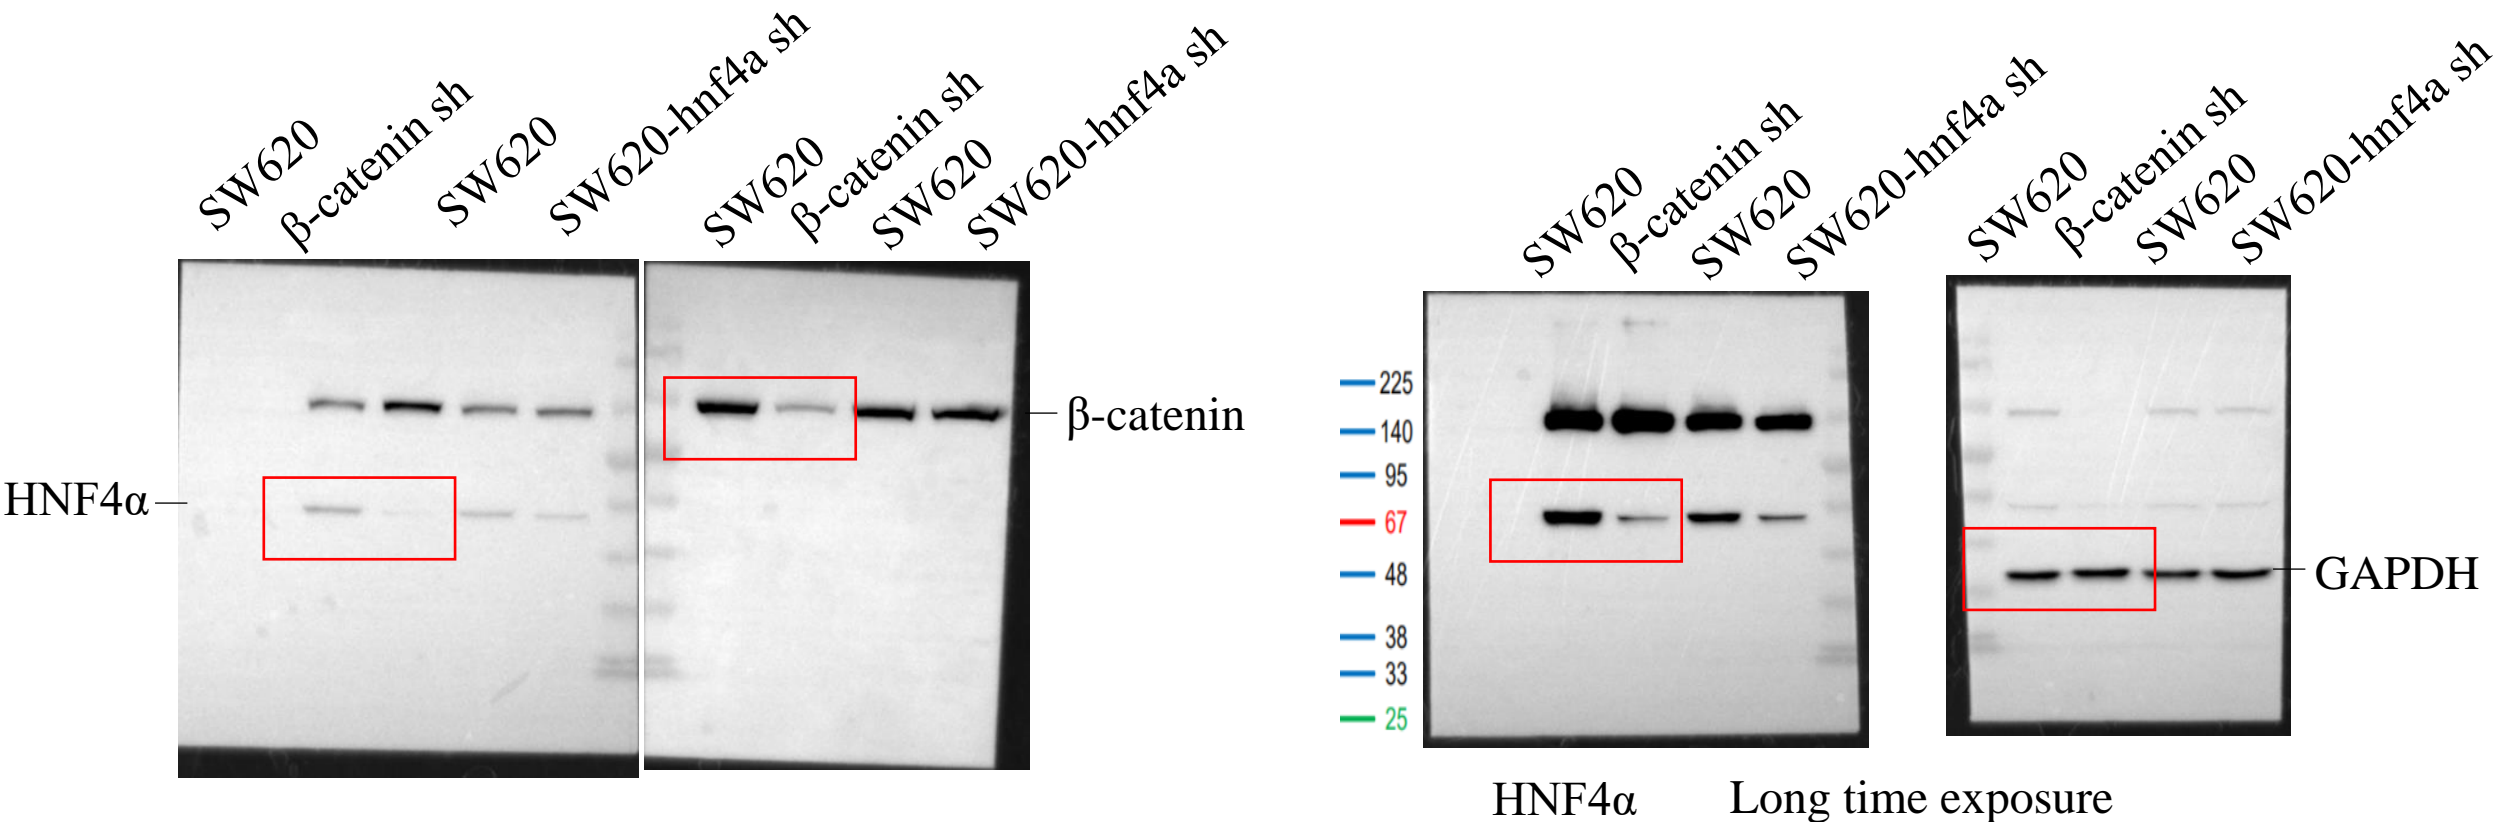

Fig 3G

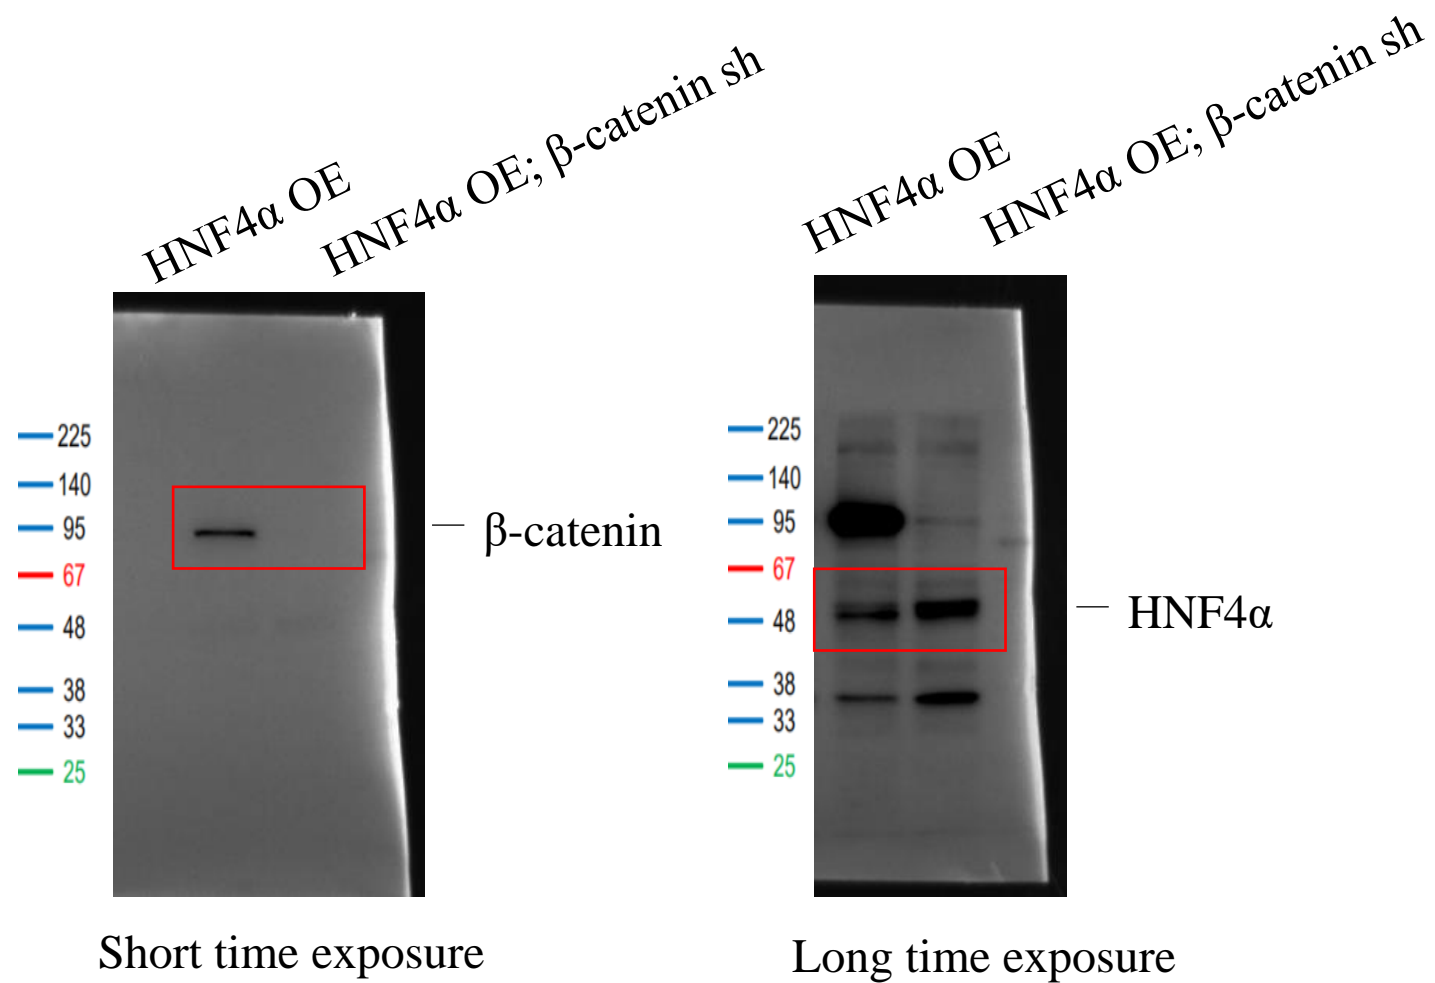

10% SDS polyacrylamide gel was used for protein separation.

Fig 3E

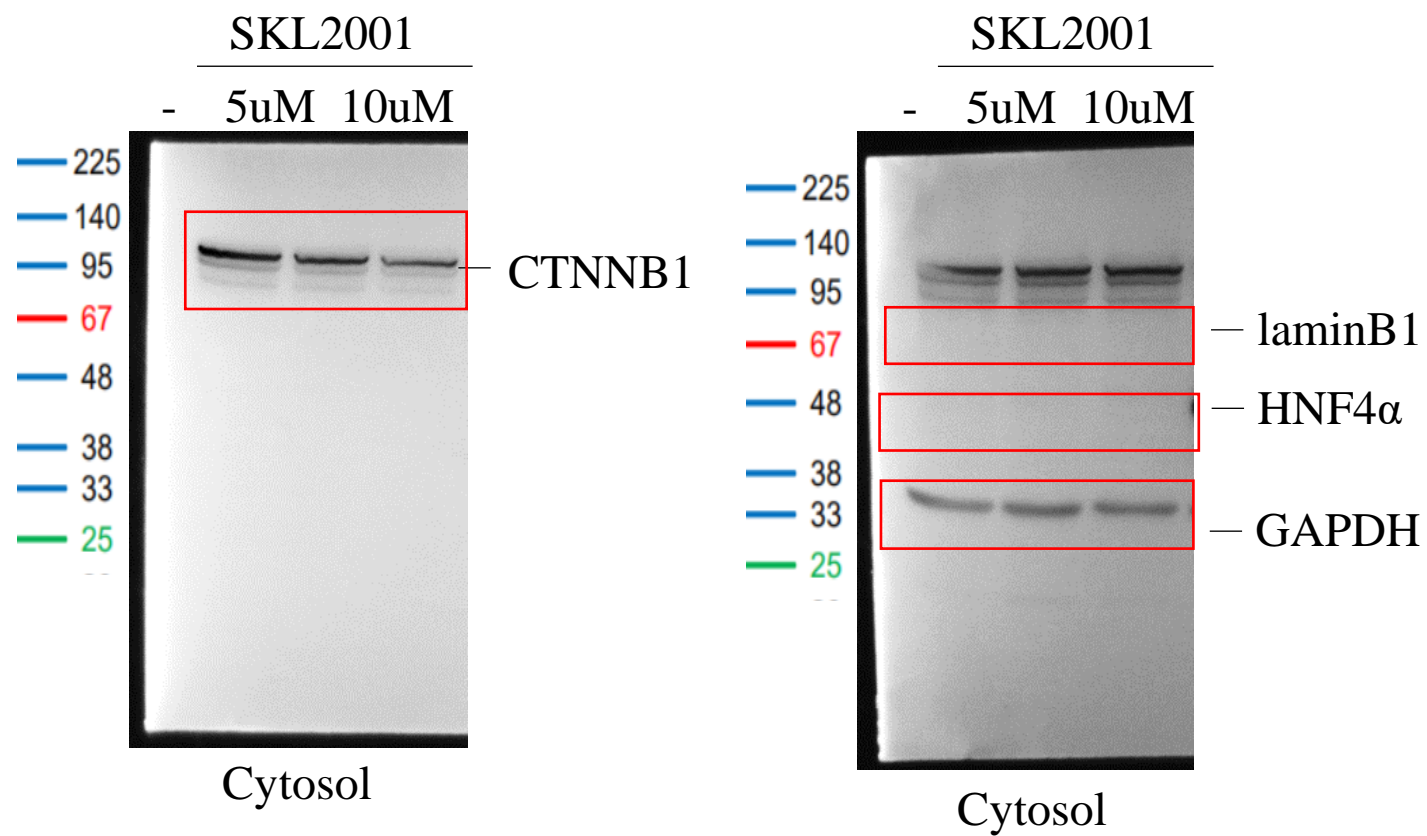

10% SDS polyacrylamide gel was used for protein separation.

Fig 3E

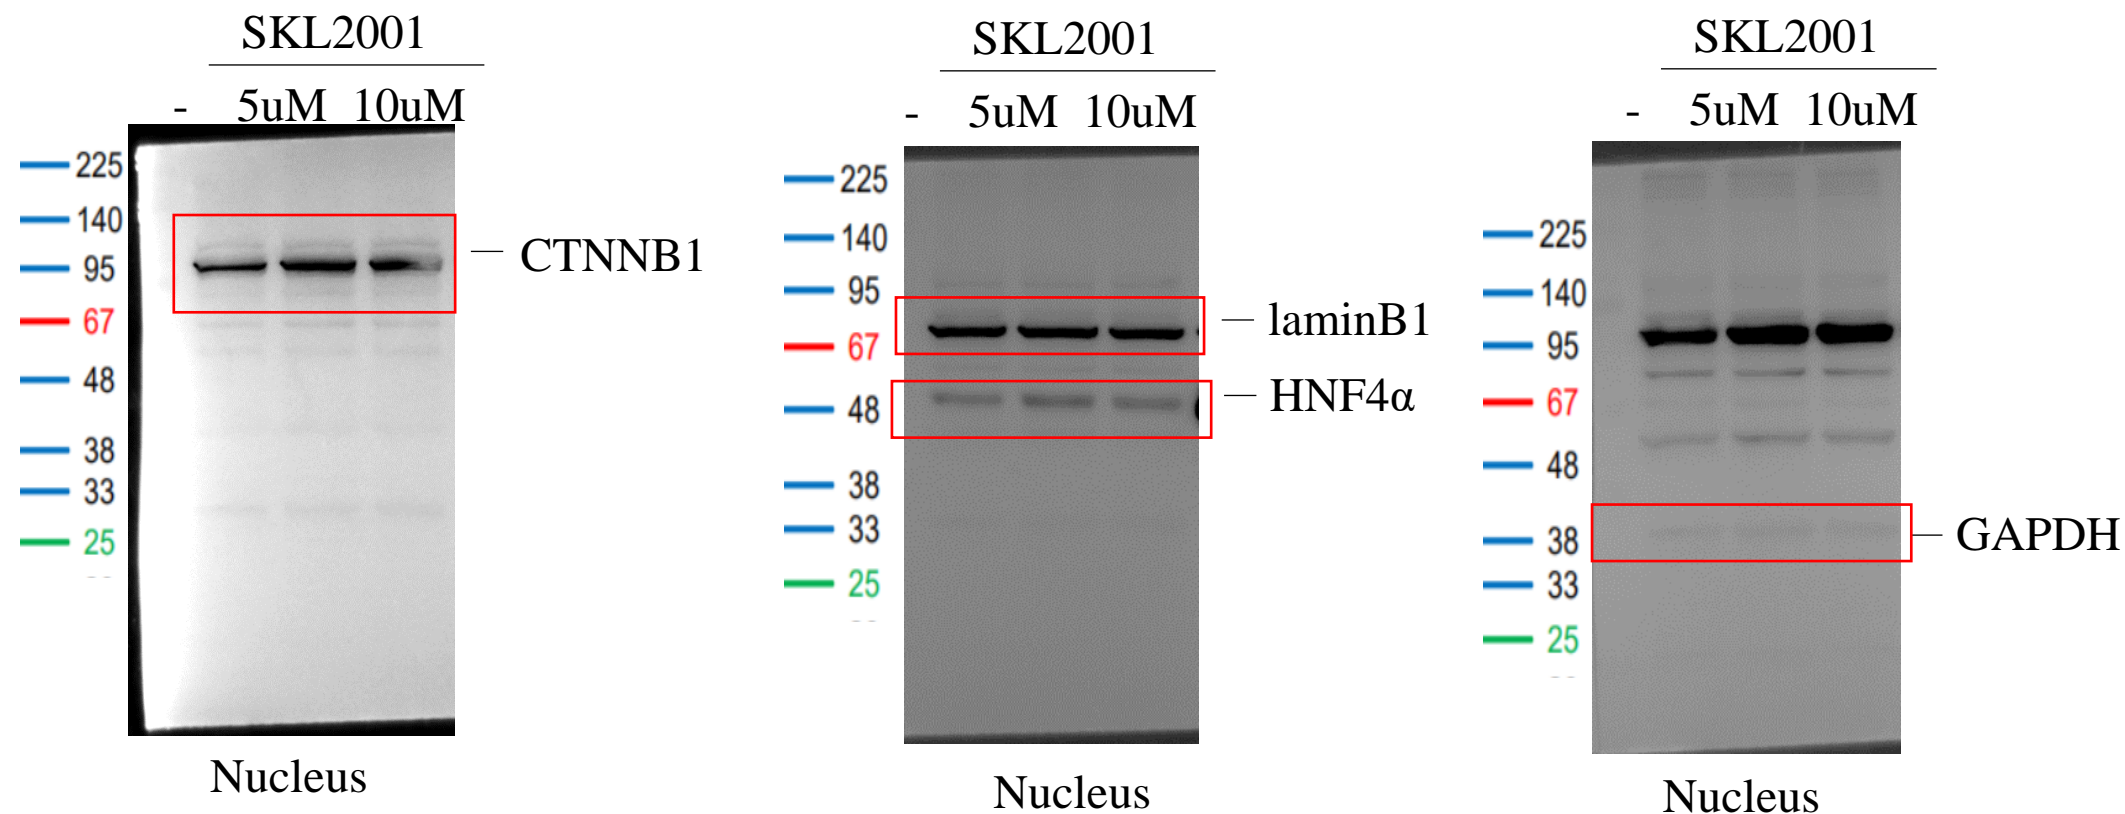

10% SDS polyacrylamide gel was used for protein separation.

Fig 3F

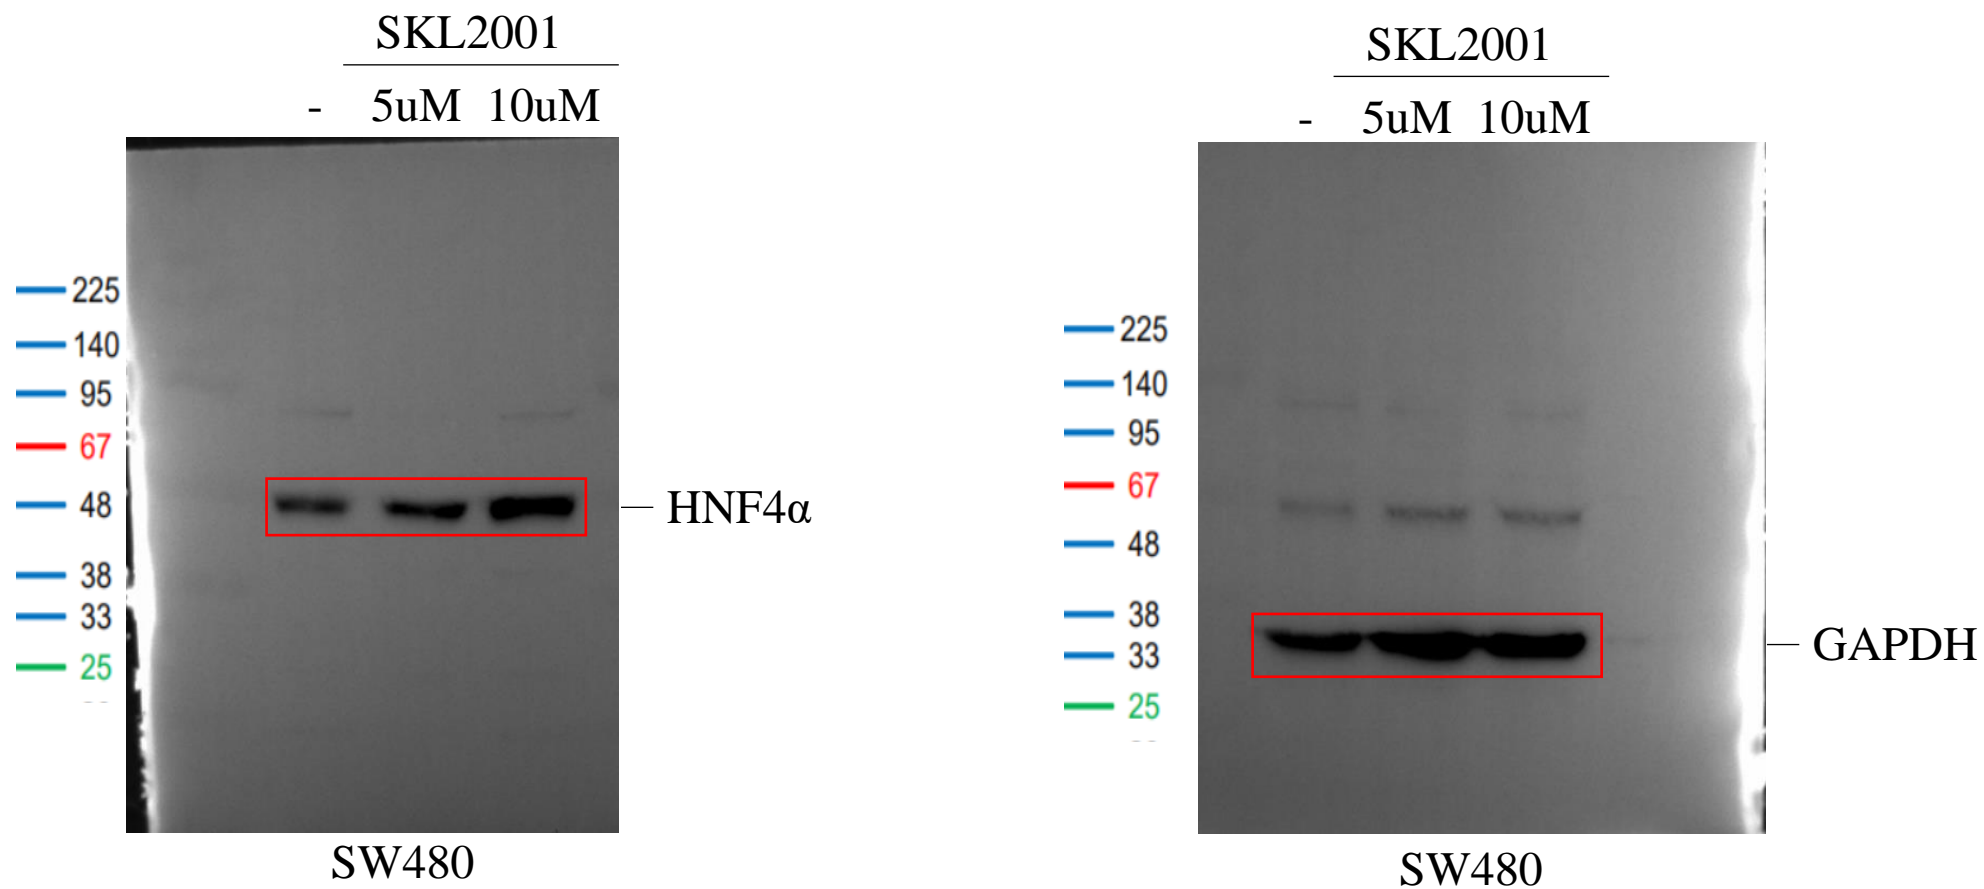

10% SDS polyacrylamide gel was used for protein separation.

Fig 3F

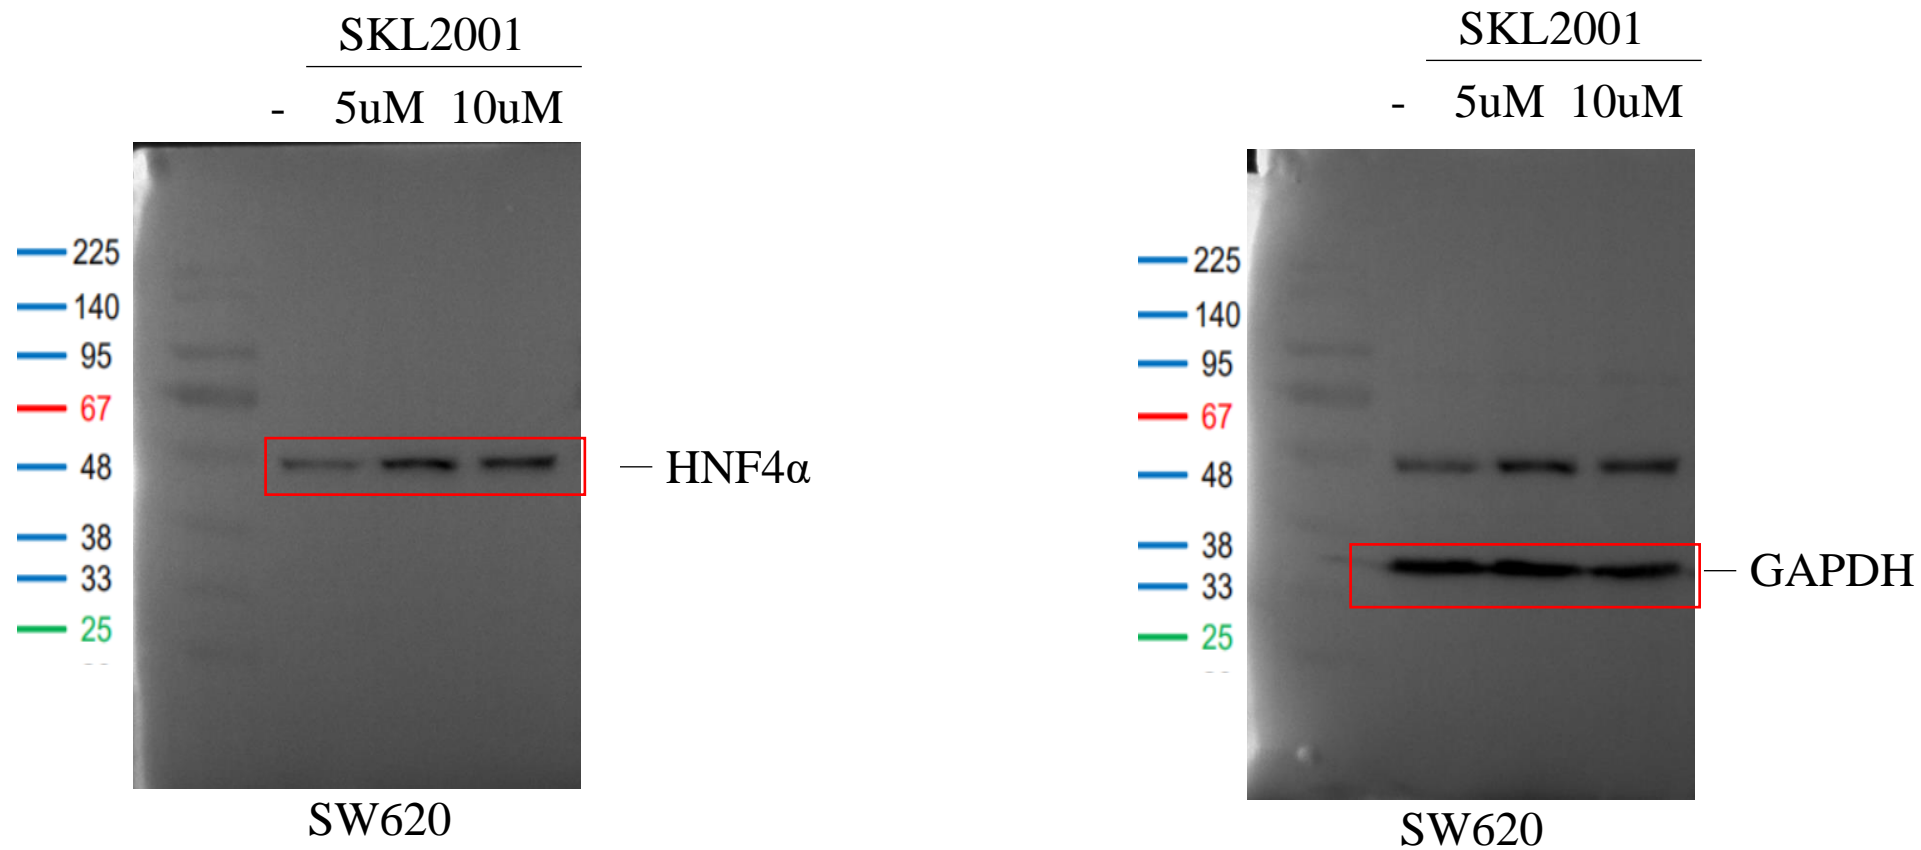

10% SDS polyacrylamide gel was used for protein separation.



Fig 3F

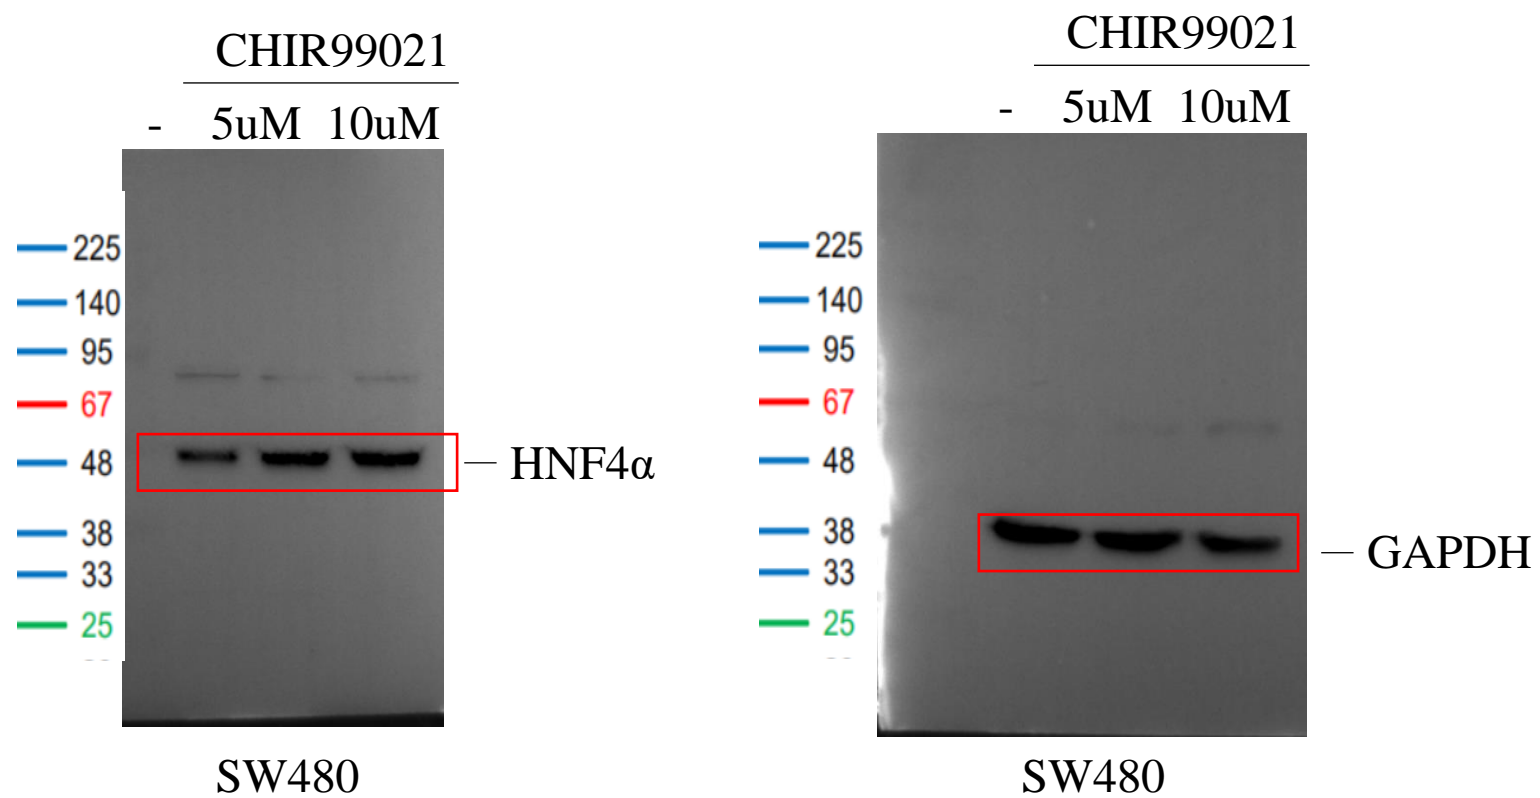

10% SDS polyacrylamide gel was used for protein separation.

Fig 3F

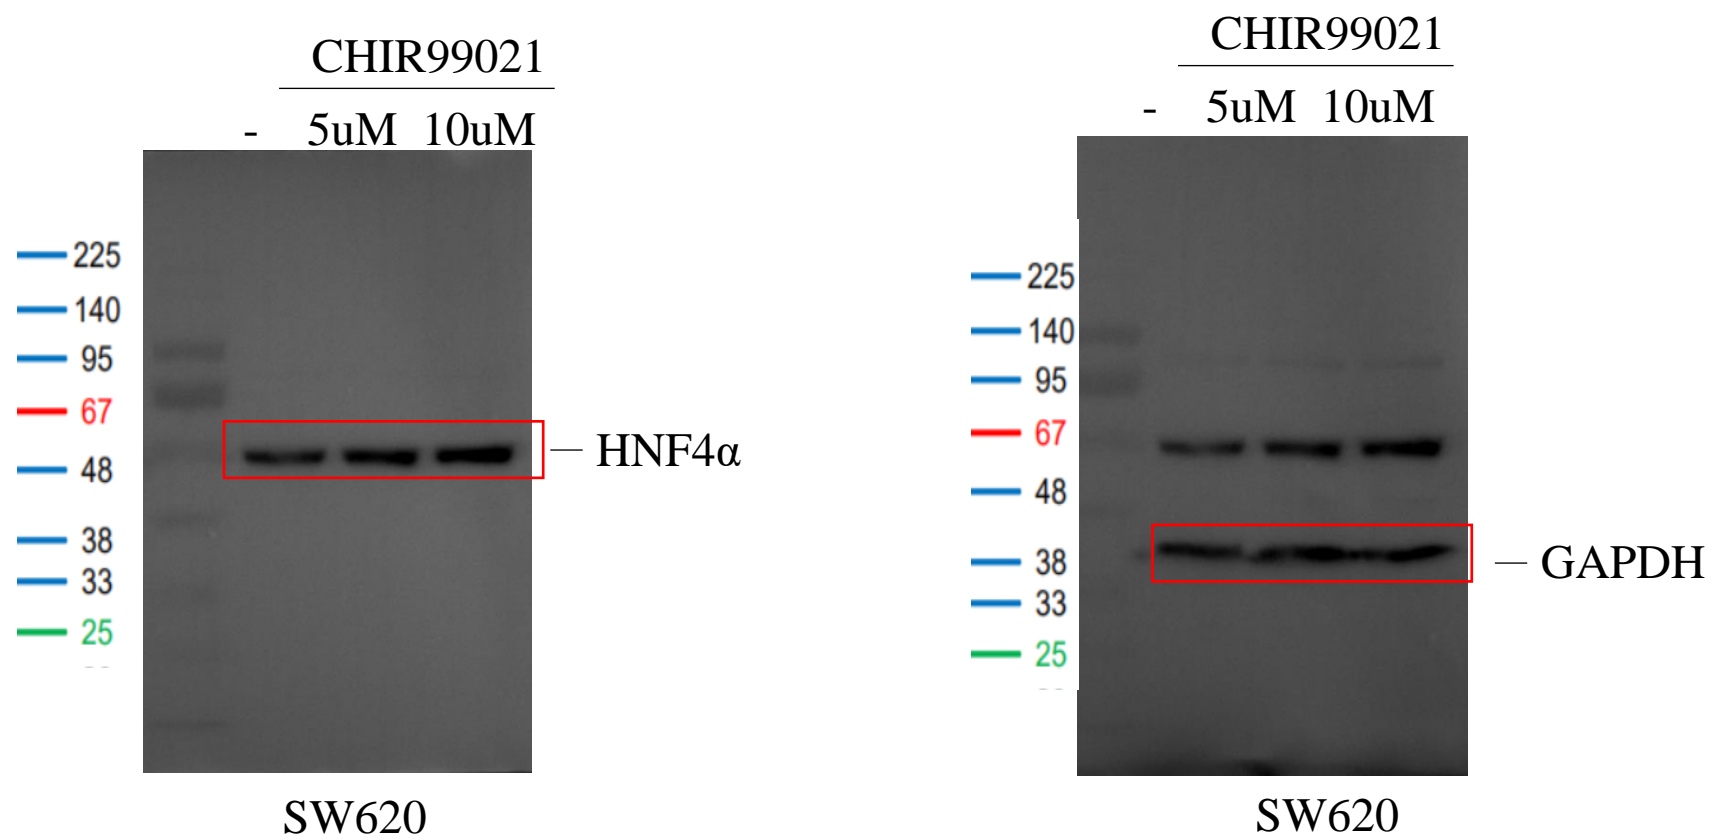

10% SDS polyacrylamide gel was used for protein separation.

Fig 4E

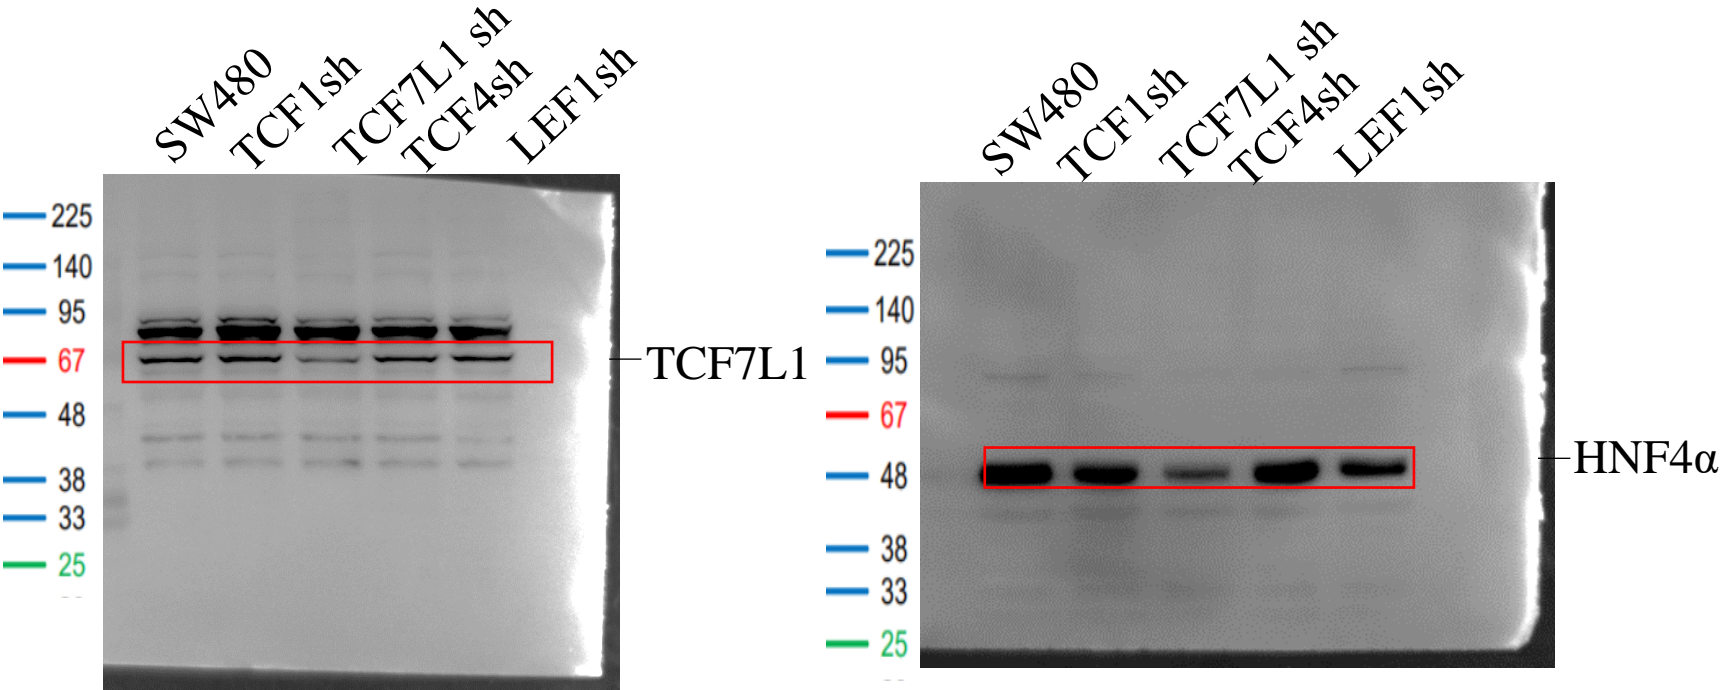

10% SDS polyacrylamide gel was used for protein separation.

Fig 4E

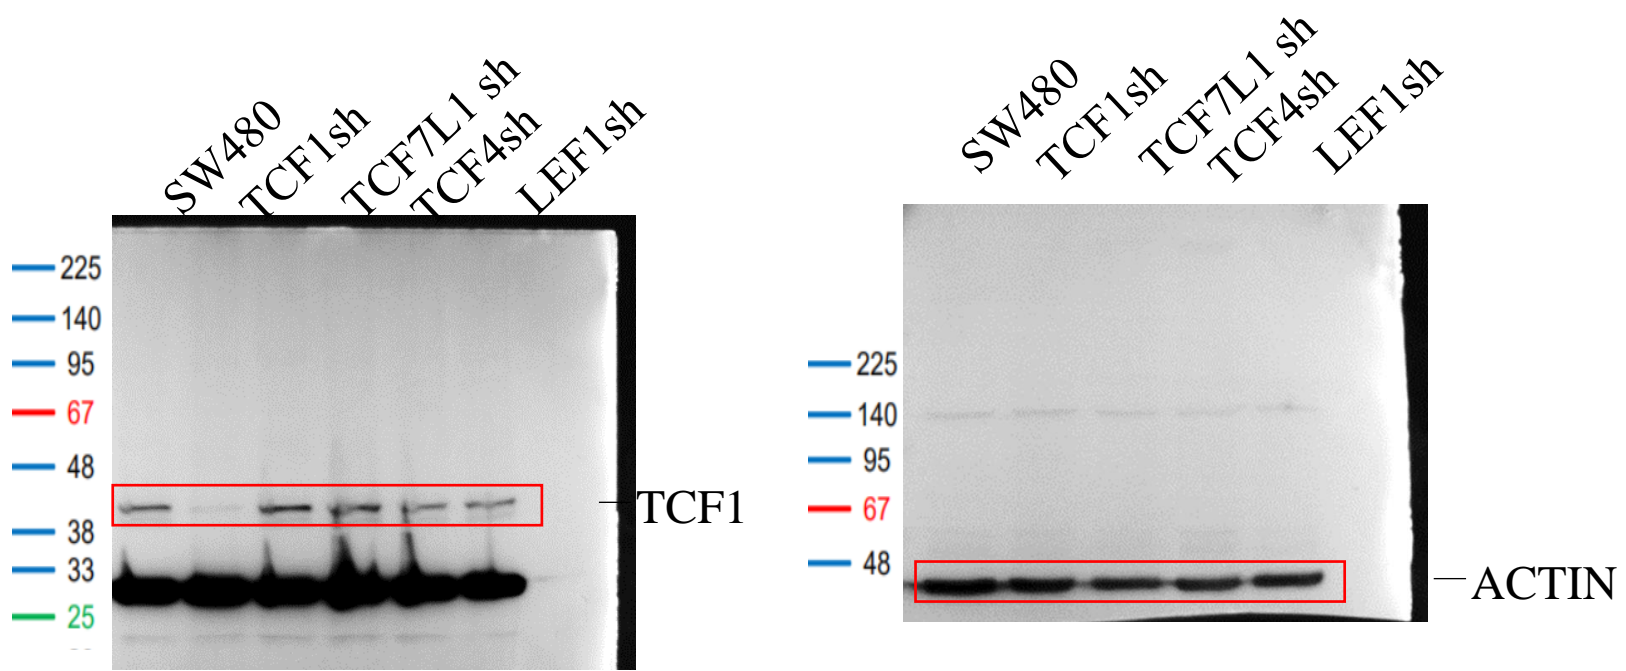

10% SDS polyacrylamide gel was used for protein separation.

Fig 4G

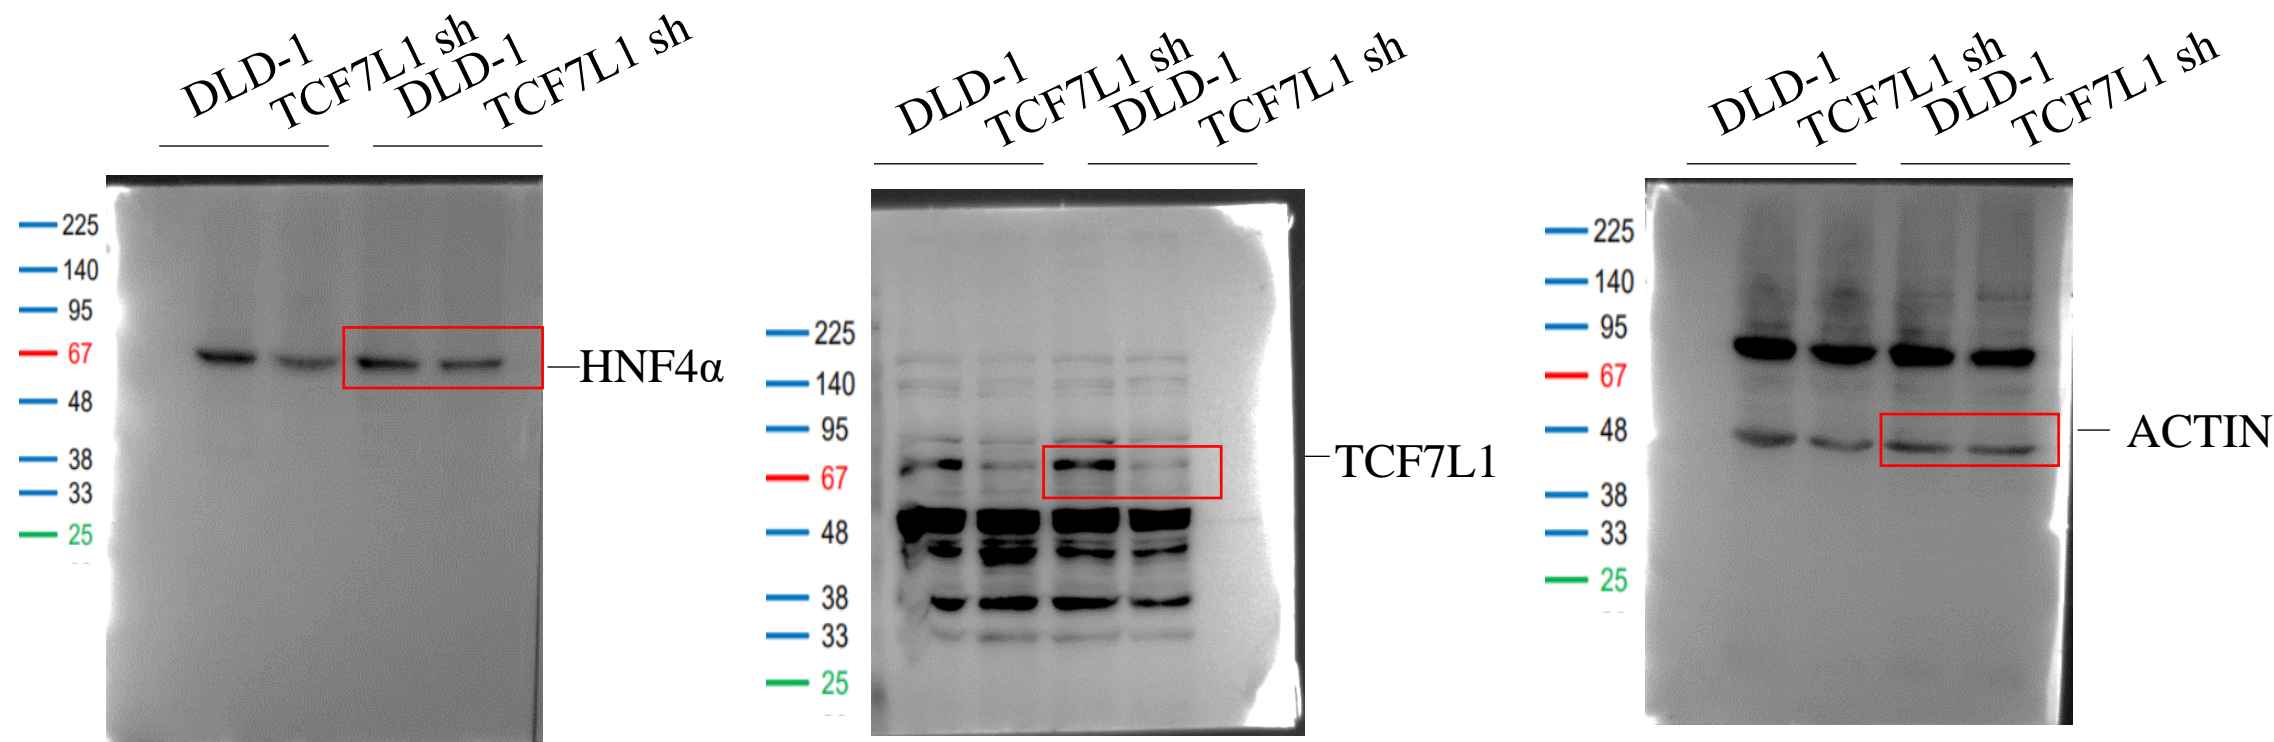

Protein separation was performed using duplicate 10% SDS-polyacrylamide gels to resolve bands with closely spaced molecular weights.

Fig 4G

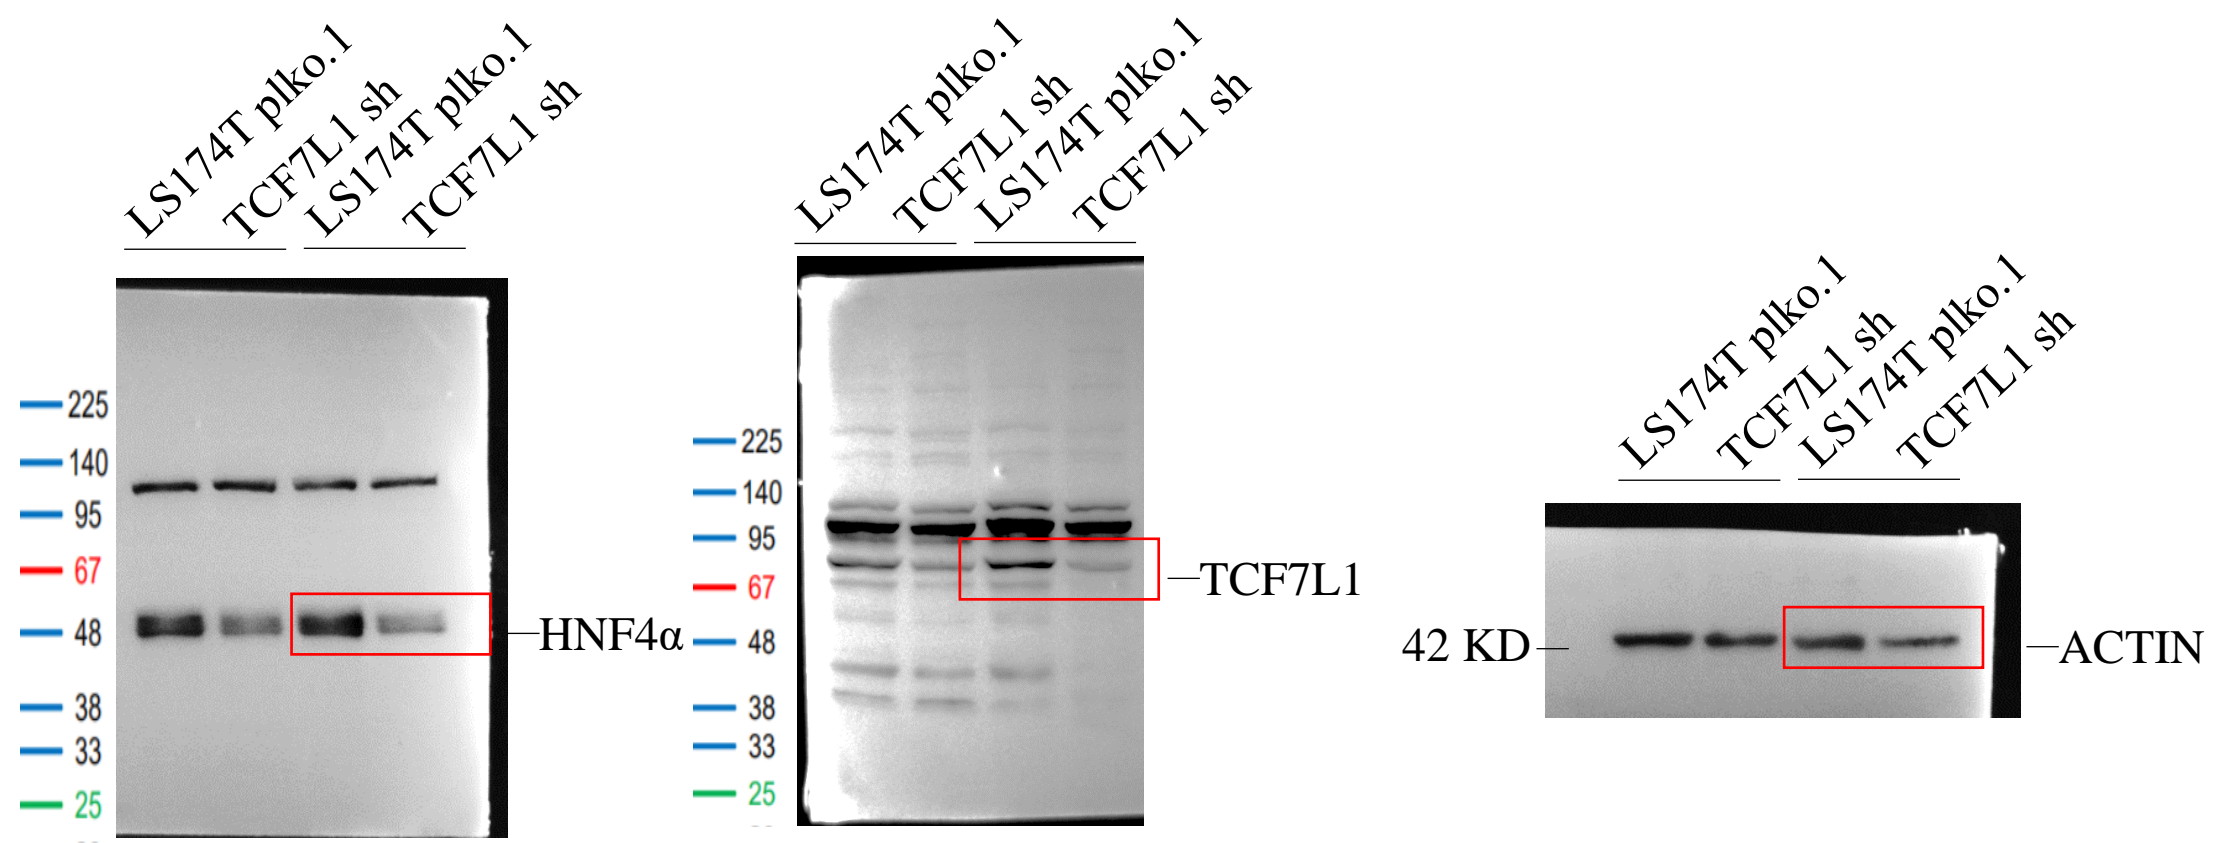

Fig 4H

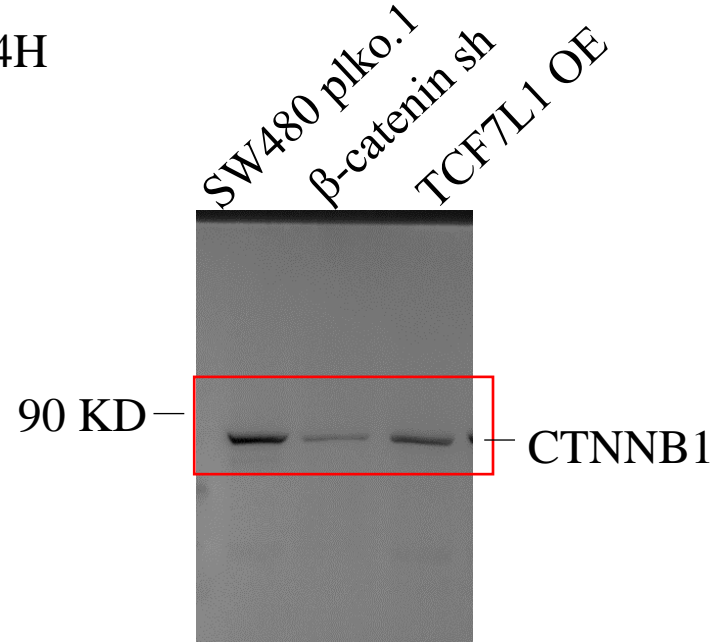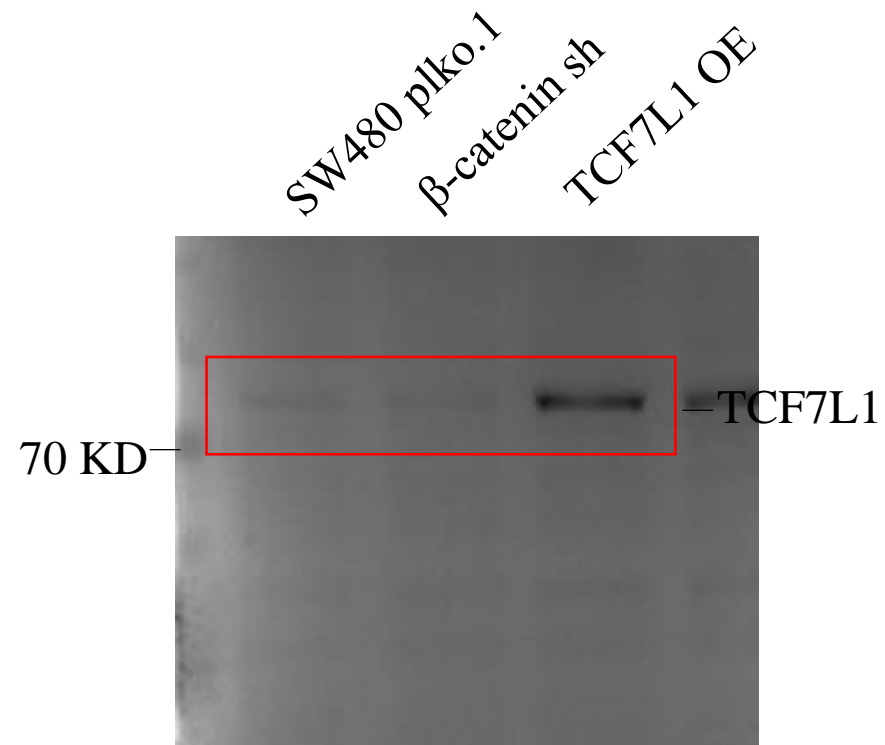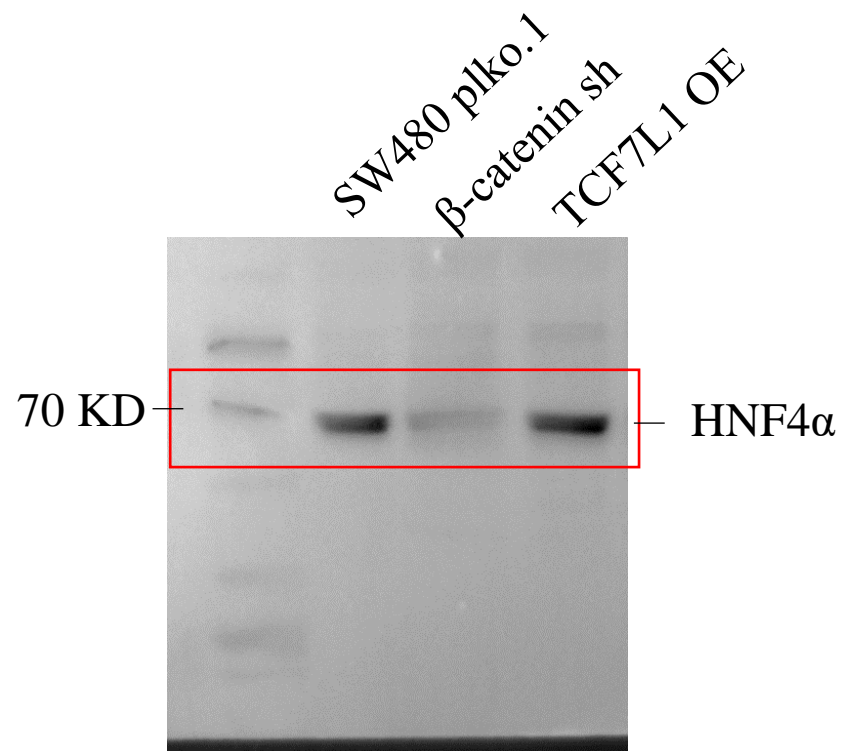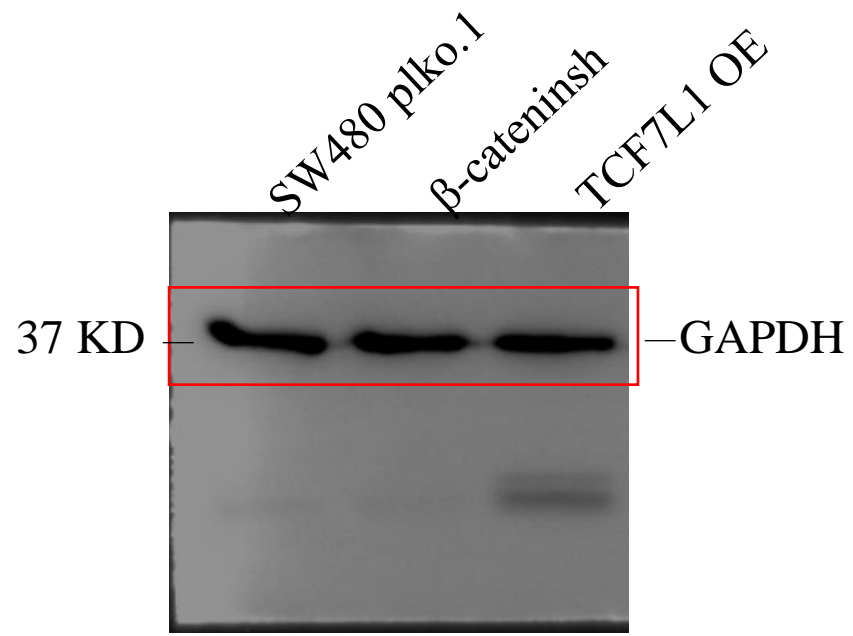



Fig 4I

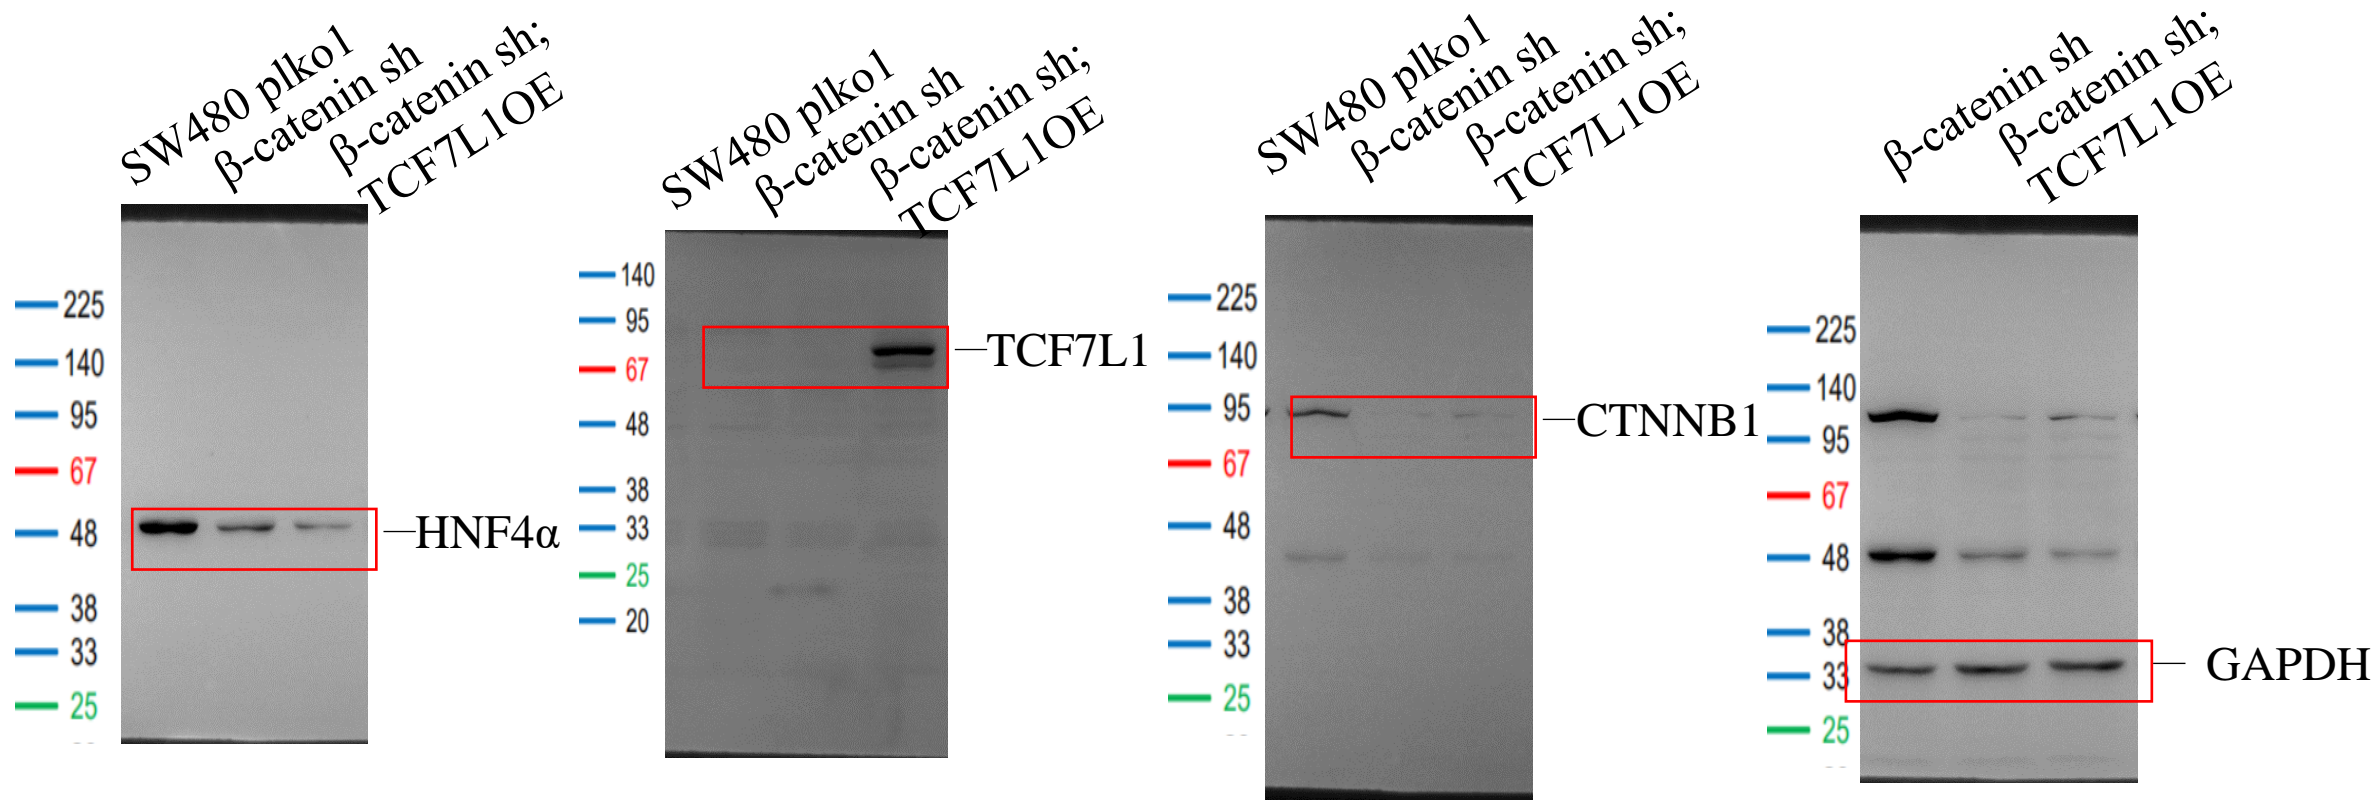



Fig 6E

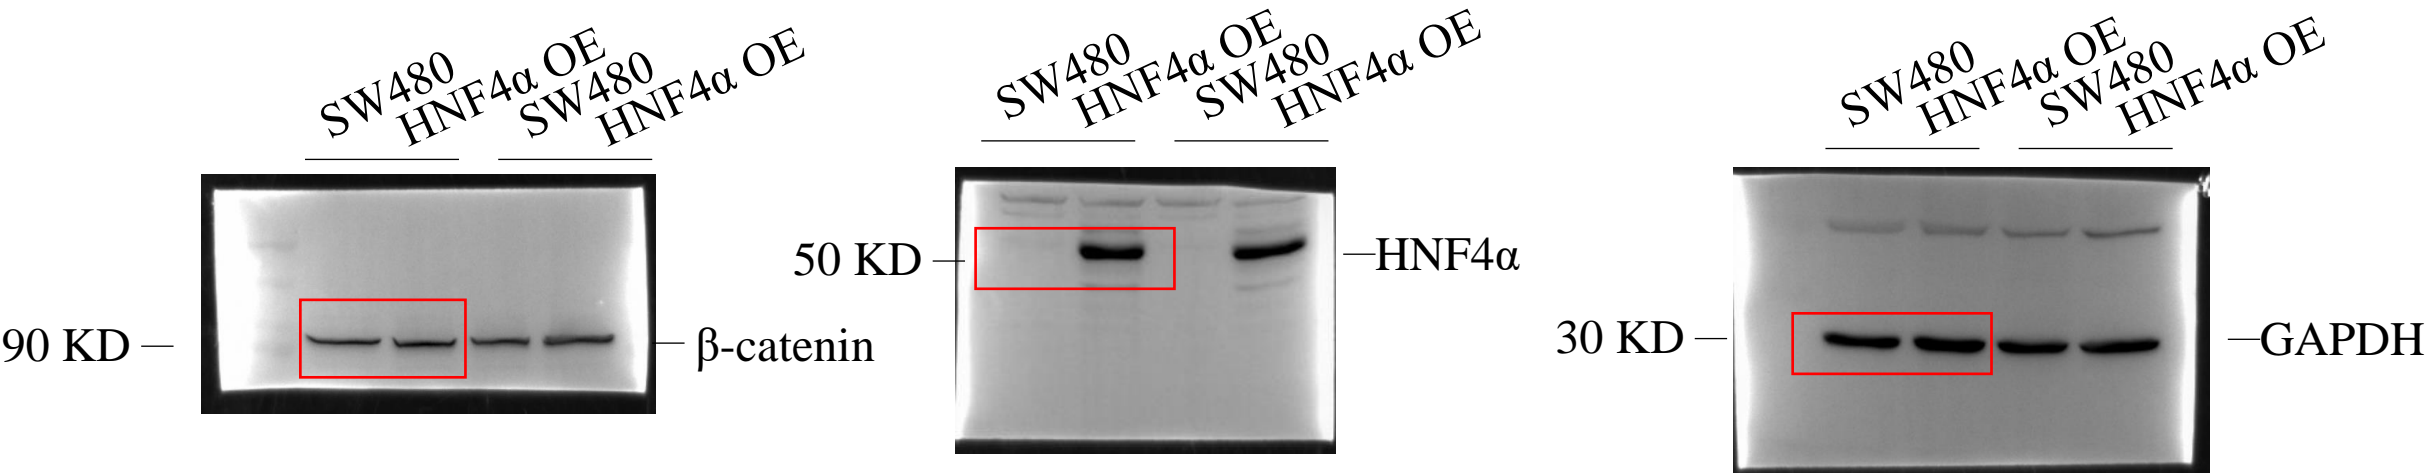

10% SDS polyacrylamide gel was used for protein separation.

Fig 6F

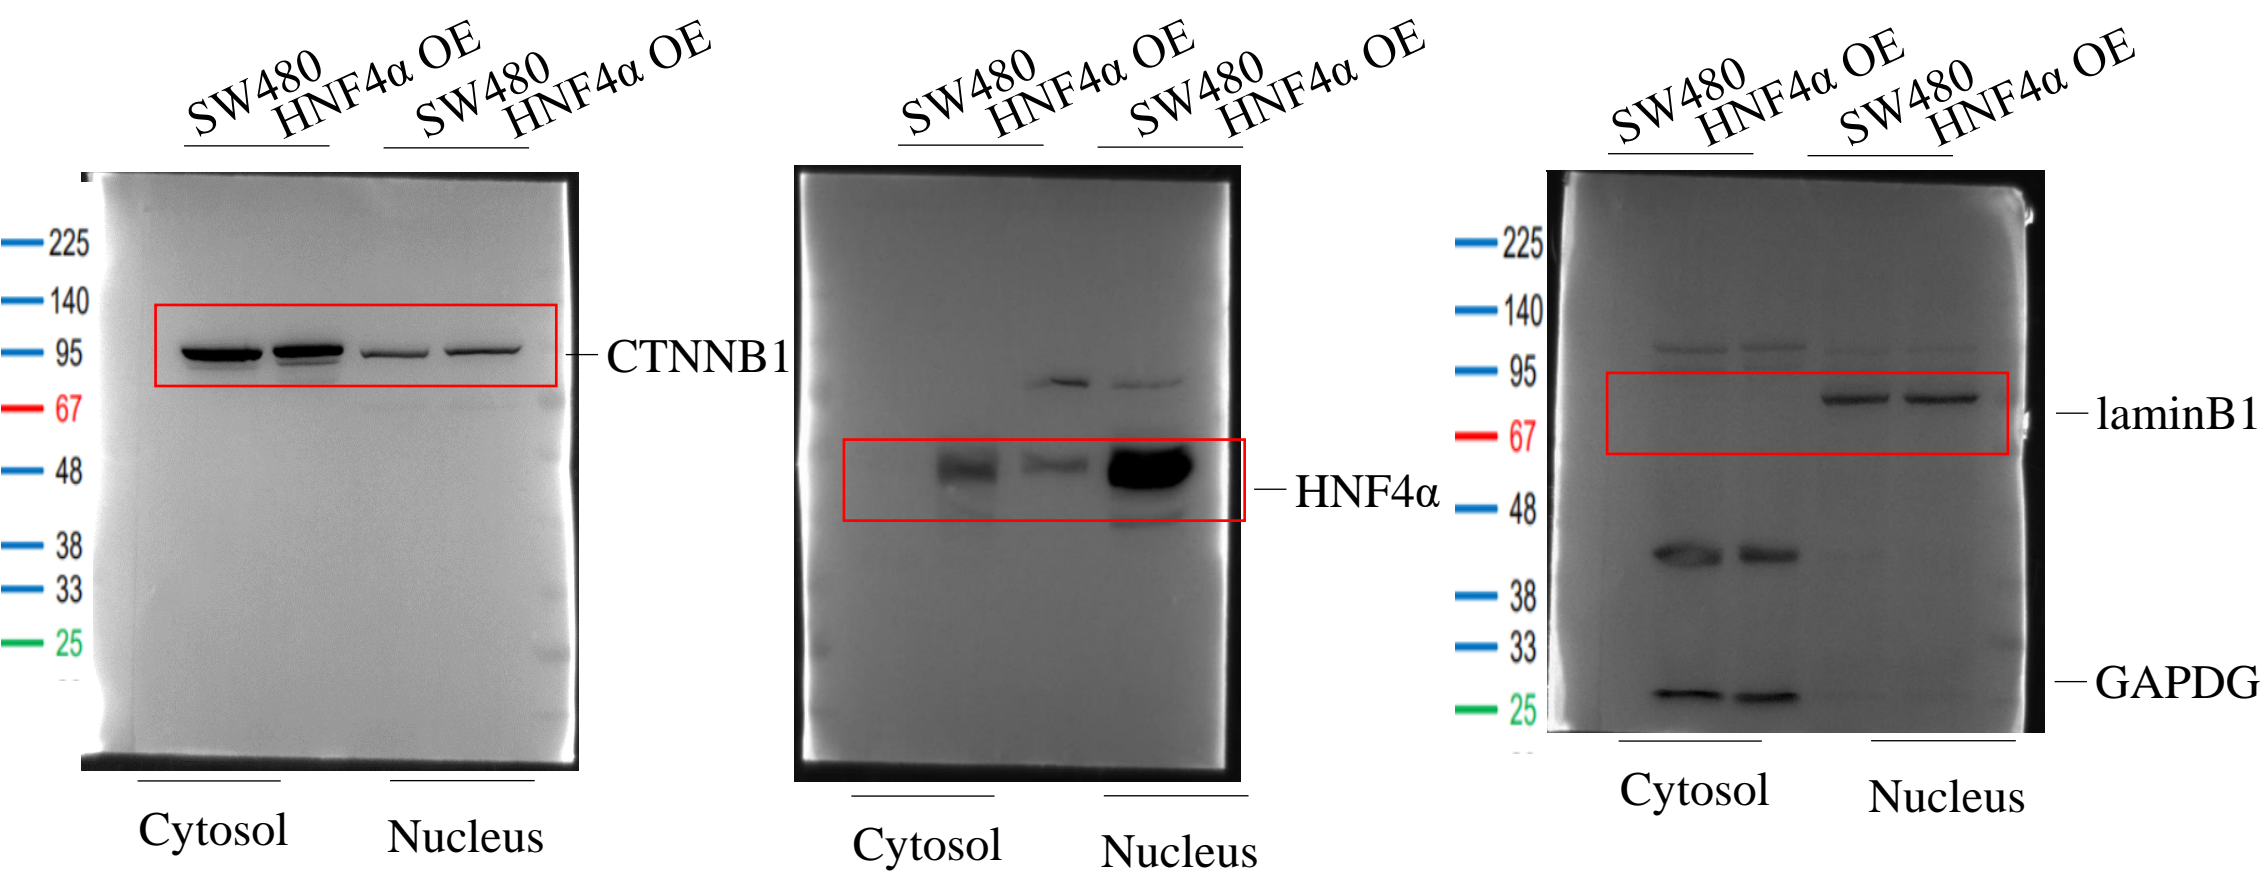

10% SDS polyacrylamide gel was used for protein separation.

Fig 7G

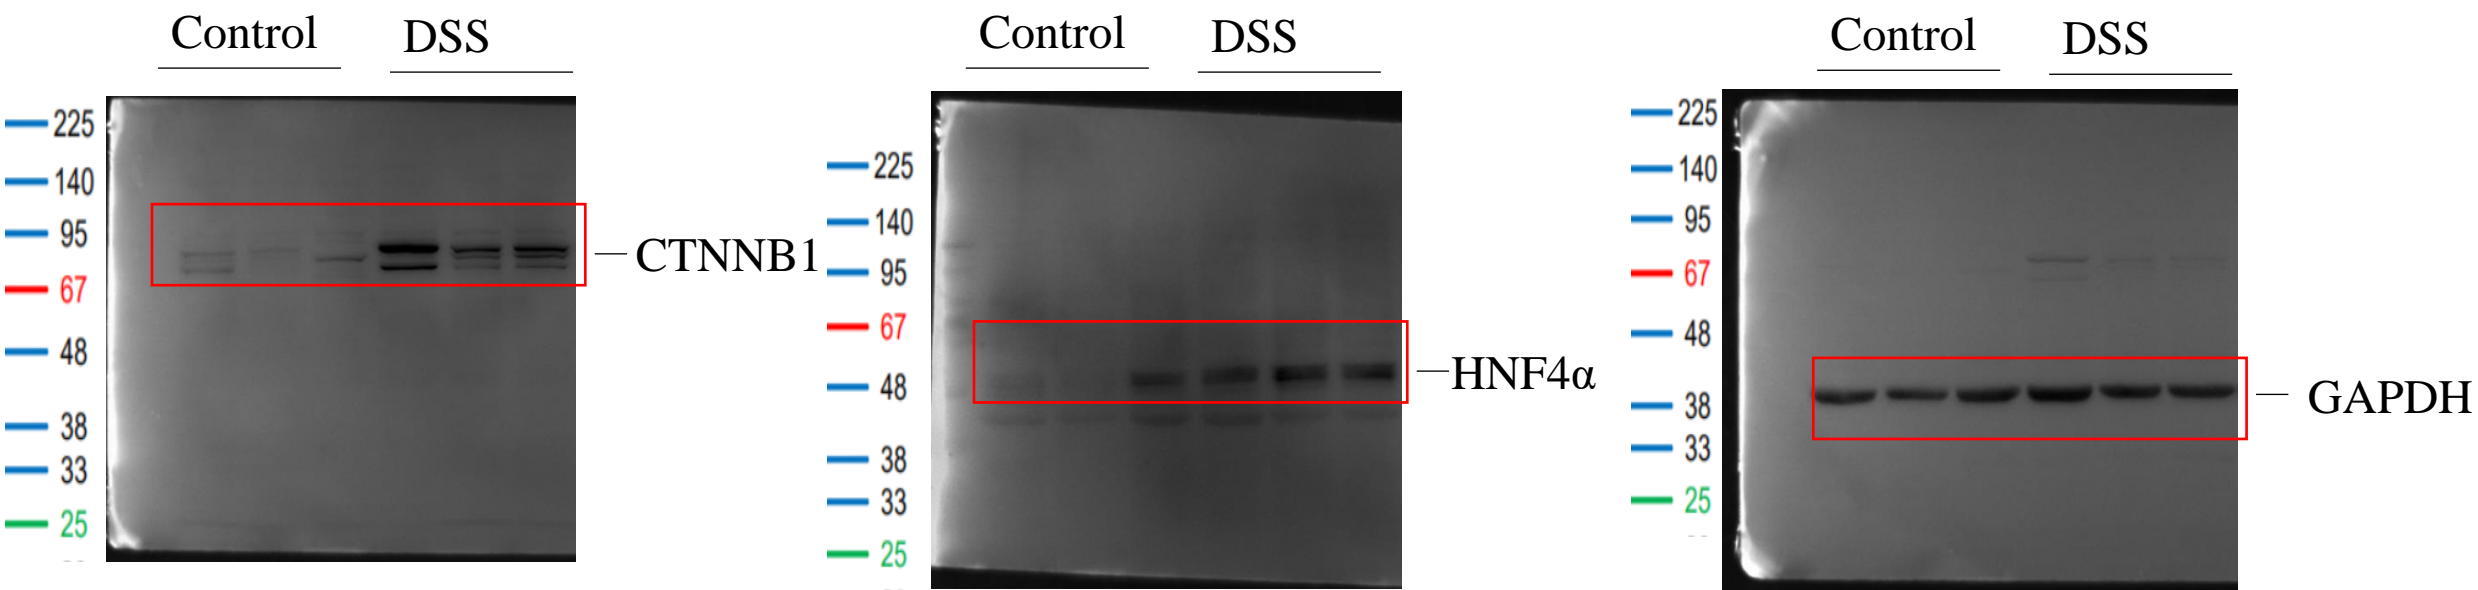

10% SDS polyacrylamide gel was used for protein separation.
